# Supplementary material
Source: ML conference proceedings conference paper supplement (https://openreview.net/forum?id=uRKqXoN-Ic9)
Supplement: supplementary_material [file attachment]

## A APPENDIX

### A.1 DIRICHLET-BASED UNCERTAINTY MODELS

In this section, we provide details on the losses used by each DBU model. PostNet uses a Bayesian loss which can be expressed as follows:

$$L_{\text{PostNet}} = \frac{1}{N} \sum_i \mathbb{E}_{q(p^{(i)})} [\text{CE}(p^{(i)}, y^{(i)})] - H(q^{(i)}) \quad (3)$$

where CE denotes the cross-entropy. Both the expectation term (i.e.  $\mathbb{E}_{q(p^{(i)})} [\text{CE}(p^{(i)}, y^{(i)})]$ ) and the entropy term (i.e.  $H(q^{(i)})$ ) can be computed in closed-form (Charpentier et al., 2020). PriorNet uses a loss composed of two KL divergence terms for ID and OOD data:

$$L_{\text{PriorNet}} = \frac{1}{N} \left[ \sum_{\mathbf{x}^{(i)} \in \text{ID data}} [\text{KL}[\text{Dir}(\alpha^{\text{ID}}) || q^{(i)}]] + \sum_{\mathbf{x}^{(i)} \in \text{OOD data}} [\text{KL}[\text{Dir}(\alpha^{\text{OOD}}) || q^{(i)}]] \right]. \quad (4)$$

Both KL divergences terms can be computed in closed-form (Malinin & Gales, 2019). The precision  $\alpha^{\text{ID}}$  and  $\alpha^{\text{OOD}}$  are hyper-parameters. The precision  $\alpha^{\text{ID}}$  is usually set to  $1e^1$  for the correct class and 1 otherwise. The precision  $\alpha^{\text{OOD}}$  is usually set to 1. DDNet uses the Dirichlet likelihood of soft labels produce by an ensemble of  $M$  neural networks:

$$L_{\text{DDNet}} = -\frac{1}{N} \sum_i \sum_{m=1}^M [\ln q^{(i)}(\pi^{im})] \quad (5)$$

where  $\pi^{im}$  denotes the soft-label of  $m$ th neural network. The Dirichlet likelihood can be computed in closed-form (Malinin et al., 2019). EvNet uses the expected mean square error between the one-hot encoded label and the predicted categorical distribution:

$$L_{\text{EvNet}} = \frac{1}{N} \sum_i \mathbb{E}_{\mathbf{p}^{(i)} \sim \text{Dir}(\alpha^{(i)})} ||\mathbf{y}^{*(i)} - \mathbf{p}^{(i)}||^2 \quad (6)$$

where  $\mathbf{y}^{*(i)}$  denotes the one-hot encoded label. The expected MSE loss can also be computed in closed form (Sensoy et al., 2018). For more details please have a look at the original paper on PriorNet (Malinin & Gales, 2018a), PostNet (Charpentier et al., 2020), DDNet (Malinin & Gales, 2019) and EvNet (Sensoy et al., 2018).

### A.2 CLOSED-FORM COMPUTATION OF UNCERTAINTY MEASURES & UNCERTAINTY ATTACKS

Dirichlet-based uncertainty models allow to compute several uncertainty measures in closed form (see (Malinin & Gales, 2018a) for a derivation). As proposed by Malinin & Gales (2018a), we use precision  $m_{\alpha_0}$ , differential entropy  $m_{\text{diffE}}$  and mutual information  $m_{\text{MI}}$  to estimate uncertainty on predictions.

The differential entropy  $m_{\text{diffE}}$  of a DBU model reaches its maximum value for equally probable categorical distributions and thus, a on flat Dirichlet distribution. It is a measure for distributional uncertainty and expected to be low on ID data, but high on OOD data.

$$m_{\text{diffE}} = \sum_c^K \ln \Gamma(\alpha_c) - \ln \Gamma(\alpha_0) - \sum_c^K (\alpha_c - 1) \cdot (\Psi(\alpha_c) - \Psi(\alpha_0)) \quad (7)$$

where  $\alpha$  are the parameters of the Dirichlet-distribution,  $\Gamma$  is the Gamma function and  $\Psi$  is the Digamma function.

The mutual information  $m_{\text{MI}}$  is the difference between the total uncertainty (entropy of the expected distribution) and the expected uncertainty on the data (expected entropy of the distribution). This uncertainty is expected to be low on ID data and high on OOD data.

$$m_{\text{MI}} = -\sum_{c=1}^K \frac{\alpha_c}{\alpha_0} \left( \ln \frac{\alpha_c}{\alpha_0} - \Psi(\alpha_c + 1) + \Psi(\alpha_0 + 1) \right) \quad (8)$$

Furthermore, we use the precision  $\alpha_0$  to measure uncertainty, which is expected to be high on ID data and low on OOD data.

$$m_{\alpha_0} = \alpha_0 = \sum_{c=1}^K \alpha_c \quad (9)$$

As these uncertainty measures are computed in closed form and it is possible to obtain their gradients, we use them (i.e.  $m_{\text{diffE}}$ ,  $m_{\text{MI}}$ ,  $m_{\alpha_0}$ ) as target function of our uncertainty attacks. Changing the attacked target function allows us to use a wide range of gradient-based attacks such as FGSM attacks, PGD attacks, but also more sophisticated attacks such as Carlini-Wagner attacks.

### A.3 DETAILS OF THE EXPERIMENTAL SETUP

**Models.** We trained all models with a similar based architecture. We used namely 3 linear layers for vector data sets, 3 convolutional layers with size of  $5 + 3$  linear layers for MNIST and the VGG16 Simonyan & Zisserman (2015) architecture with batch normalization for CIFAR10. All the implementation are performed using Pytorch (Paszke et al., 2019). We optimized all models using Adam optimizer. We performed early stopping by checking for loss improvement every 2 epochs and a patience of 10. The models were trained on GPUs (1 TB SSD).

We performed a grid-search for hyper-parameters for all models. The learning rate grid search was done in  $[1e^{-5}, 1e^{-3}]$ . For PostNet, we used Radial Flows with a depth of 6 and a latent space equal to 6. Further, we performed a grid search for the regularizing factor in  $[1e^{-7}, 1e^{-4}]$ . For PriorNet, we performed a grid search for the OOD loss weight in  $[1, 10]$ . For DDNet, we distilled the knowledge of 5 neural networks after a grid search in  $[2, 5, 10, 20]$  neural networks. Note that it already implied a significant overhead at training compare to other models.

**Metrics.** For all experiments, we focused on using AUC-PR scores since it is well suited to imbalance tasks (Saito & Rehmsmeier, 2015) while bringing theoretically similar information than AUC-ROC scores (Davis & Goadrich, 2006). We scaled all scores from  $[0, 1]$  to  $[0, 100]$ . All results are average over 5 training runs using the best hyper-parameters found after the grid search.

**Data sets.** For vector data sets, we use 5 different random splits to train all models. We split the data in training, validation and test sets (60%, 20%, 20%).

We use the segment vector data set Dua & Graff (2017), where the goal is to classify areas of images into 7 classes (window, foliage, grass, brickface, path, cement, sky). We remove class window from ID training data to provide OOD training data to PriorNet. Further, We remove the class 'sky' from training and instead use it as the OOD data set for OOD detection experiments. Each input is composed of 18 attributes describing the image area. The data set contains 2,310 samples in total.

We further use the Sensorless Drive vector data set Dua & Graff (2017), where the goal is to classify extracted motor current measurements into 11 different classes. We remove class 9 from ID training data to provide OOD training data to PriorNet. We remove classes 10 and 11 from training and use them as the OOD dataset for OOD detection experiments. Each input is composed of 49 attributes describing motor behaviour. The data set contains 58,509 samples in total.

Additionally, we use the MNIST image data set LeCun & Cortes (2010) where the goal is to classify pictures of hand-drawn digits into 10 classes (from digit 0 to digit 9). Each input is composed of a  $1 \times 28 \times 28$  tensor. The data set contains 70,000 samples. For OOD detection experiments, we use FashionMNIST Xiao et al. (2017) and KMNIST Clanuwat et al. (2018) containing images of Japanese characters and images of clothes, respectively. FashionMNIST was used as training OOD for PriorNet while KMNIST is used as OOD at test time.

Finally, we use the CIFAR10 image data set Krizhevsky et al. (2009) where the goal is to classify a picture of objects into 10 classes (airplane, automobile, bird, cat, deer, dog, frog, horse, ship, truck). Each input is a  $3 \times 32 \times 32$  tensor. The data set contains 60,000 samples. For OOD detection experiments, we use street view house numbers (SVHN) Netzer et al. (2011) and CIFAR100 (Krizhevsky et al., 2009) containing images of numbers and objects respectively. CIFAR100 was used as training OOD for PriorNet while SVHN is used as OOD at test time.

**Perturbations.** For all label and uncertainty attacks, we used Fast Gradient Sign Methods and Project Gradient Descent. We tried 6 different radii  $[0.0, 0.1, 0.2, 0.5, 1.0, 2.0, 4.0]$ . These radii operate on

the input space after data normalization. We bound perturbations by  $L_\infty$ -norm or by  $L_2$ -norm, with

$$L_\infty(x) = \max_{i=1,\dots,D} |x_i| \quad \text{and} \quad L_2(x) = \left( \sum_{i=1}^D x_i^2 \right)^{0.5}. \quad (10)$$

For  $L_\infty$ -norm it is obvious how to relate perturbation size  $\varepsilon$  with perturbed input images, because all inputs are standardized such that the values of their features are between 0 and 1. A perturbation of size  $\varepsilon = 0$  corresponds to the original input, while a perturbation of size  $\varepsilon = 1$  corresponds to the whole input space and allows to change all features to any value.

For  $L_2$ -norm the relation between perturbation size  $\varepsilon$  and perturbed input images is less obvious. To justify our choice for  $\varepsilon$  w.r.t. this norm, we relate perturbations size  $\varepsilon_2$  corresponding to  $L_2$ -norm with perturbations size  $\varepsilon_\infty$  corresponding to  $L_\infty$ -norm. First, we compute  $\varepsilon_2$ , such that the  $L_2$ -norm is the smallest super-set of the  $L_\infty$ -norm. Let us consider a perturbation of  $\varepsilon_\infty$ . The largest  $L_2$ -norm would be obtained if each feature is perturbed by  $\varepsilon_\infty$ . Thus, perturbation  $\varepsilon_2$ , such that  $L_2$  encloses  $L_\infty$  is  $\varepsilon_2 = \left( \sum_{i=1}^D \varepsilon_\infty^2 \right)^{0.5} = \sqrt{D} \varepsilon_\infty$ . For the MNIST-data set, with  $D = 28 \times 28$  input features  $L_2$ -norm with  $\varepsilon_2 = 28$  encloses  $L_\infty$ -norm with  $\varepsilon_\infty = 1$ .

Alternatively,  $\varepsilon_2$  can be computed such that the volume spanned by  $L_2$ -norm is equivalent to the one spanned by  $L_\infty$ -norm. Using that the volume spanned by  $L_\infty$ -norm is  $\varepsilon_\infty^D$  and the volume spanned by  $L_2$ -norm is  $\frac{\pi^{0.5D} \varepsilon_2^D}{\Gamma(0.5D+1)}$  (where  $\Gamma$  is the Gamma-function), we obtain volume equivalence if  $\varepsilon_2 = \Gamma(0.5D+1)^{\frac{1}{D}} \sqrt{\pi} \varepsilon_\infty$ . For the MNIST-data set, with  $D = 28 \times 28$  input features  $L_2$ -norm with  $\varepsilon_2 \approx 21.39$  is volume equivalent to  $L_\infty$ -norm with  $\varepsilon_\infty = 1$ .

## A.4 ADDITIONAL EXPERIMENTS

Table 7 and 8 illustrate that no DBU model maintains high accuracy under gradient-based label attacks. Accuracy under PGD attacks decreases more than under FGSM attacks, since PGD is stronger. Interestingly Noise attacks achieve also good performances with increasing Noise standard deviation. Note that the attack is not constraint to be with a given radius for Noise attacks.

Table 7: Accuracy under PGD label attacks.

| Att. Rad.  | 0.0         | 0.1         | 0.2         | 0.5         | 1.0         | 2.0         | 4.0         |         | 0.0         | 0.1         | 0.2         | 0.5         | 1.0         | 2.0         | 4.0        |
|------------|-------------|-------------|-------------|-------------|-------------|-------------|-------------|---------|-------------|-------------|-------------|-------------|-------------|-------------|------------|
| MNIST      |             |             |             |             |             |             |             | CIFAR10 |             |             |             |             |             |             |            |
| PostNet    | <b>99.4</b> | <b>99.2</b> | <b>98.8</b> | 96.8        | 89.6        | 53.8        | 13.0        |         | 89.5        | 73.5        | 51.7        | 13.2        | 2.2         | 0.8         | 0.3        |
| PriorNet   | 99.3        | 99.1        | <b>98.8</b> | 97.4        | <b>93.9</b> | <b>75.3</b> | 4.8         |         | 88.2        | <b>77.8</b> | <b>68.4</b> | <b>54.0</b> | <b>37.9</b> | <b>17.5</b> | <b>5.1</b> |
| DDNet      | <b>99.4</b> | 99.1        | <b>98.8</b> | <b>97.5</b> | 91.6        | 48.8        | 0.2         |         | 86.1        | 73.9        | 59.1        | 20.5        | 1.5         | 0.0         | 0.0        |
| EvNet      | 99.2        | 98.9        | 98.4        | 96.8        | 92.4        | 73.1        | <b>40.9</b> |         | <b>89.8</b> | 71.7        | 48.8        | 11.5        | 2.7         | 1.5         | 0.4        |
| Sensorless |             |             |             |             |             |             |             | Segment |             |             |             |             |             |             |            |
| PostNet    | 98.3        | 13.1        | 6.4         | 4.0         | <b>7.0</b>  | <b>9.8</b>  | <b>11.3</b> |         | 98.9        | 82.8        | <b>50.1</b> | <b>19.2</b> | <b>8.8</b>  | <b>5.1</b>  | <b>8.6</b> |
| PriorNet   | <b>99.3</b> | 16.5        | 5.6         | 1.2         | 0.4         | 0.2         | 1.6         |         | <b>99.5</b> | 90.7        | 47.6        | 7.8         | 0.2         | 0.0         | 0.4        |
| DDNet      | <b>99.3</b> | 12.4        | 2.4         | 0.6         | 0.3         | 0.1         | 0.1         |         | 99.2        | <b>90.8</b> | 45.7        | 6.9         | 0.0         | 0.0         | 0.0        |
| EvNet      | 99.0        | <b>35.3</b> | <b>22.3</b> | <b>11.2</b> | <b>7.0</b>  | 5.2         | 4.0         |         | 99.3        | 91.8        | 54.0        | 10.3        | 0.8         | 0.5         | 0.6        |

Table 8: Accuracy under FGSM label attacks.

| Att. Rad.  | 0.0         | 0.1         | 0.2         | 0.5         | 1.0         | 2.0         | 4.0         |         | 0.0         | 0.1         | 0.2         | 0.5         | 1.0         | 2.0         | 4.0         |
|------------|-------------|-------------|-------------|-------------|-------------|-------------|-------------|---------|-------------|-------------|-------------|-------------|-------------|-------------|-------------|
| MNIST      |             |             |             |             |             |             |             | CIFAR10 |             |             |             |             |             |             |             |
| PostNet    | <b>99.4</b> | <b>99.2</b> | <b>98.9</b> | 97.7        | 95.2        | <b>90.1</b> | <b>79.2</b> |         | 89.5        | 72.3        | 54.9        | 31.2        | 21.0        | 16.8        | 15.6        |
| PriorNet   | 99.3        | 99.1        | <b>98.9</b> | 97.7        | <b>95.8</b> | 93.2        | 76.7        |         | 88.2        | <b>77.3</b> | <b>70.1</b> | <b>59.4</b> | <b>52.3</b> | <b>48.5</b> | <b>46.8</b> |
| DDNet      | <b>99.4</b> | <b>99.2</b> | <b>98.9</b> | <b>97.8</b> | 94.7        | 79.2        | 25.2        |         | 86.1        | 73.0        | 60.2        | 32.5        | 14.6        | 7.1         | 6.0         |
| EvNet      | 99.2        | 98.9        | 98.6        | 97.6        | <b>95.8</b> | <b>90.1</b> | 74.4        |         | <b>89.8</b> | 71.4        | 54.5        | 29.6        | 18.1        | 14.4        | 13.4        |
| Sensorless |             |             |             |             |             |             |             | Segment |             |             |             |             |             |             |             |
| PostNet    | 98.3        | 19.6        | 10.9        | 10.9        | 11.9        | 12.4        | 12.5        |         | 98.9        | 79.6        | <b>57.3</b> | <b>31.5</b> | <b>18.4</b> | <b>20.6</b> | <b>19.9</b> |
| PriorNet   | <b>99.3</b> | 24.7        | 11.8        | 8.6         | 8.5         | 8.1         | 8.3         |         | <b>99.5</b> | 85.5        | 40.5        | 8.9         | 0.4         | 0.3         | 0.2         |
| DDNet      | <b>99.3</b> | 18.0        | 8.2         | 6.5         | 5.4         | 6.7         | 7.8         |         | 99.2        | 86.4        | 36.2        | 11.9        | 0.9         | 0.0         | 0.0         |
| EvNet      | 99.0        | <b>42.0</b> | <b>28.0</b> | <b>17.5</b> | <b>13.7</b> | <b>13.6</b> | <b>14.9</b> |         | 99.3        | <b>90.6</b> | 55.2        | 14.2        | 2.4         | 0.5         | 0.1         |

Table 9: Accuracy under Noise label attacks.

| Noise Std  | 0.0         | 0.1         | 0.2         | 0.5         | 1.0         | 2.0         | 4.0         |         | 0.0         | 0.1         | 0.2         | 0.5         | 1.0         | 2.0         | 4.0         |
|------------|-------------|-------------|-------------|-------------|-------------|-------------|-------------|---------|-------------|-------------|-------------|-------------|-------------|-------------|-------------|
| MNIST      |             |             |             |             |             |             |             | CIFAR10 |             |             |             |             |             |             |             |
| PostNet    | <b>99.4</b> | <b>98.6</b> | 91.8        | <b>14.9</b> | <b>1.3</b>  | <b>0.1</b>  | 0.0         |         | <b>91.7</b> | 21.5        | 10.1        | 0.1         | 1.2         | 0.0         | 1.9         |
| PriorNet   | 99.3        | 98.5        | <b>95.7</b> | 14.4        | 0.0         | 0.0         | 0.0         |         | 87.7        | <b>28.1</b> | <b>11.2</b> | 9.7         | 5.0         | <b>8.5</b>  | <b>9.0</b>  |
| DDNet      | <b>99.4</b> | <b>98.6</b> | 92.4        | 13.3        | 0.7         | 0.0         | 0.0         |         | 81.7        | 23.0        | <b>11.2</b> | <b>11.2</b> | <b>11.0</b> | 7.8         | 6.7         |
| EvNet      | 99.3        | 96.9        | 81.6        | 11.7        | 0.5         | 0.0         | 0.0         |         | 89.5        | 20.7        | 11.1        | 5.2         | 0.5         | 2.3         | 3.9         |
| Sensorless |             |             |             |             |             |             |             | Segment |             |             |             |             |             |             |             |
| PostNet    | 98.1        | 0.1         | <b>3.7</b>  | <b>11.7</b> | <b>11.7</b> | <b>11.7</b> | <b>11.7</b> |         | 98.5        | 39.4        | 3.9         | <b>1.8</b>  | <b>12.1</b> | <b>20.3</b> | <b>22.1</b> |
| PriorNet   | <b>99.3</b> | 0.2         | 0.0         | 0.0         | 0.0         | 0.3         | 2.4         |         | <b>99.4</b> | 47.9        | 8.8         | 0.0         | 0.0         | 0.0         | 0.0         |
| DDNet      | 99.0        | <b>0.4</b>  | 0.1         | 0.0         | 0.0         | 0.0         | 0.0         |         | 99.1        | 50.0        | <b>10.3</b> | 0.0         | 0.0         | 0.3         | 0.0         |
| EvNet      | 98.6        | 0.2         | 0.0         | 0.1         | 1.4         | 4.6         | 8.8         |         | 99.1        | <b>50.3</b> | <b>10.3</b> | 1.2         | 0.3         | 0.0         | 1.5         |

## A.4.1 UNCERTAINTY ESTIMATION UNDER LABEL ATTACKS

## Is high certainty a reliable indicator of correct predictions?

On non-perturbed data uncertainty estimates are an indicator of correctly classified samples, but if the input data is perturbed none of the DBU models maintains its high performance. Thus, uncertainty estimates are not a robust indicator of correctly labeled inputs.

Table 10: Certainty based on differential entropy under PGD label attacks (AUC-PR).

| Att. Rad. | MNIST        |              |             |             |             |             |             |  | Segment      |             |             |             |            |            |             |
|-----------|--------------|--------------|-------------|-------------|-------------|-------------|-------------|--|--------------|-------------|-------------|-------------|------------|------------|-------------|
|           | 0.0          | 0.1          | 0.2         | 0.5         | 1.0         | 2.0         | 4.0         |  | 0.0          | 0.1         | 0.2         | 0.5         | 1.0        | 2.0        | 4.0         |
| PostNet   | 99.9         | 99.9         | 99.8        | 98.7        | 89.5        | 43.5        | 9.0         |  | 99.9         | 77.6        | 31.6        | <b>11.1</b> | <b>5.3</b> | <b>4.4</b> | 8.7         |
| PriorNet  | 99.9         | 99.8         | 99.6        | 97.7        | 90.5        | <b>69.1</b> | 6.4         |  | <b>100.0</b> | <b>96.8</b> | 44.5        | 4.5         | 0.4        | 0.0        | <b>15.2</b> |
| DDNet     | <b>100.0</b> | <b>100.0</b> | <b>99.9</b> | <b>99.7</b> | <b>97.6</b> | 50.2        | 0.1         |  | <b>100.0</b> | <b>96.8</b> | <b>54.0</b> | 4.3         | 0.0        | 0.0        | 0.0         |
| EvNet     | 99.6         | 99.3         | 98.7        | 96.1        | 88.8        | 63.1        | <b>31.7</b> |  | <b>100.0</b> | 95.9        | 44.3        | 5.9         | 0.8        | 0.6        | 0.7         |

Table 2, 10, 11, and 12 illustrate that neither differential entropy nor precision, nor mutual information are a reliable indicator of correct predictions under PGD attacks. DBU-models achieve significantly

Table 11: Certainty based on precision  $\alpha_0$  under PGD label attacks (AUC-PR).

| Att. Rad.  | 0.0          | 0.1          | 0.2          | 0.5         | 1.0         | 2.0         | 4.0         |         | 0.0          | 0.1         | 0.2         | 0.5         | 1.0         | 2.0         | 4.0        |
|------------|--------------|--------------|--------------|-------------|-------------|-------------|-------------|---------|--------------|-------------|-------------|-------------|-------------|-------------|------------|
| MNIST      |              |              |              |             |             |             |             | CIFAR10 |              |             |             |             |             |             |            |
| PostNet    | <b>100.0</b> | 99.9         | 99.7         | 98.2        | 87.9        | 39.1        | 6.9         |         | <b>98.7</b>  | 88.6        | 56.2        | 7.8         | 1.2         | 0.4         | 0.3        |
| PriorNet   | 99.9         | 99.8         | 99.6         | 97.7        | 90.4        | <b>69.1</b> | 6.6         |         | 92.9         | 77.7        | 60.5        | <b>37.6</b> | <b>24.9</b> | <b>11.3</b> | <b>3.0</b> |
| DDNet      | <b>100.0</b> | <b>100.0</b> | <b>100.0</b> | <b>99.8</b> | <b>98.2</b> | 51.1        | 0.1         |         | 97.6         | <b>91.8</b> | <b>78.3</b> | 18.1        | 0.8         | 0.0         | 0.0        |
| EvNet      | 99.6         | 99.2         | 98.6         | 95.7        | 88.6        | 63.6        | <b>32.6</b> |         | 97.9         | 85.9        | 57.2        | 10.2        | 4.0         | 2.4         | 0.3        |
| Sensorless |              |              |              |             |             |             |             | Segment |              |             |             |             |             |             |            |
| PostNet    | 99.6         | 7.0          | 3.3          | 3.1         | <b>6.9</b>  | <b>9.8</b>  | <b>11.3</b> |         | 99.9         | 74.2        | 31.6        | <b>11.1</b> | <b>5.0</b>  | <b>4.2</b>  | <b>8.6</b> |
| PriorNet   | 99.8         | 10.5         | 3.2          | 0.6         | 0.2         | 0.2         | 1.8         |         | <b>100.0</b> | 96.9        | <b>45.2</b> | 4.4         | 0.4         | 0.0         | 1.2        |
| DDNet      | 99.8         | 8.7          | 1.3          | 0.3         | 0.2         | 0.1         | 0.2         |         | <b>100.0</b> | <b>97.1</b> | 45.0        | 4.1         | 0.0         | 0.0         | 0.0        |
| EvNet      | <b>99.9</b>  | <b>23.2</b>  | <b>13.2</b>  | <b>6.0</b>  | 3.7         | 2.7         | 2.1         |         | <b>100.0</b> | 95.7        | 44.5        | 5.9         | 0.8         | 0.6         | 0.7        |

Table 12: Certainty based on mutual information under PGD label attacks (AUC-PR).

| Att. Rad.  | 0.0          | 0.1         | 0.2         | 0.5         | 1.0         | 2.0         | 4.0         |         | 0.0          | 0.1         | 0.2         | 0.5         | 1.0         | 2.0         | 4.0        |
|------------|--------------|-------------|-------------|-------------|-------------|-------------|-------------|---------|--------------|-------------|-------------|-------------|-------------|-------------|------------|
| MNIST      |              |             |             |             |             |             |             | CIFAR10 |              |             |             |             |             |             |            |
| PostNet    | 99.7         | 99.7        | 99.6        | 99.2        | 92.4        | 40.0        | 6.9         |         | <b>97.3</b>  | 84.5        | 56.2        | 12.2        | 2.4         | 0.7         | 0.3        |
| PriorNet   | 99.9         | 99.8        | 99.6        | 97.7        | 90.3        | <b>68.9</b> | 6.4         |         | 82.7         | 65.6        | 51.4        | <b>35.5</b> | <b>24.4</b> | <b>11.0</b> | <b>2.9</b> |
| DDNet      | <b>100.0</b> | <b>99.9</b> | <b>99.9</b> | <b>99.7</b> | <b>97.4</b> | 50.2        | 0.1         |         | 96.9         | <b>90.8</b> | <b>77.2</b> | 18.8        | 0.8         | 0.0         | 0.0        |
| EvNet      | 97.8         | 97.0        | 95.7        | 92.6        | 86.1        | 62.3        | <b>28.9</b> |         | 91.3         | 72.4        | 47.9        | 11.4        | 1.6         | 0.9         | 1.6        |
| Sensorless |              |             |             |             |             |             |             | Segment |              |             |             |             |             |             |            |
| PostNet    | 99.3         | 7.0         | 3.3         | 3.3         | <b>7.0</b>  | <b>9.8</b>  | 11.3        |         | 99.9         | 73.2        | 31.5        | <b>11.1</b> | <b>5.0</b>  | <b>4.3</b>  | <b>8.7</b> |
| PriorNet   | <b>99.8</b>  | 10.5        | 3.2         | 0.6         | 0.2         | 0.1         | <b>11.8</b> |         | <b>100.0</b> | <b>96.6</b> | <b>45.2</b> | 4.5         | 0.4         | 0.0         | 1.1        |
| DDNet      | 99.6         | 8.6         | 1.3         | 0.3         | 0.2         | 0.1         | 0.1         |         | <b>100.0</b> | 96.5        | 42.4        | 4.1         | 0.0         | 0.0         | 0.0        |
| EvNet      | 99.1         | <b>22.0</b> | <b>12.6</b> | <b>5.9</b>  | 3.7         | 2.7         | 2.2         |         | <b>100.0</b> | 90.5        | 41.0        | 5.9         | 0.8         | 0.6         | 0.7        |

Table 13: Certainty based on differential entropy under FGSM label attacks (AUC-PR).

| Att. Rad.  | 0.0          | 0.1          | 0.2         | 0.5         | 1.0         | 2.0         | 4.0         |         | 0.0          | 0.1         | 0.2         | 0.5         | 1.0         | 2.0         | 4.0         |
|------------|--------------|--------------|-------------|-------------|-------------|-------------|-------------|---------|--------------|-------------|-------------|-------------|-------------|-------------|-------------|
| MNIST      |              |              |             |             |             |             |             | CIFAR10 |              |             |             |             |             |             |             |
| PostNet    | 99.9         | 99.9         | 99.8        | 99.4        | 97.8        | <b>92.1</b> | <b>83.2</b> |         | <b>98.5</b>  | 88.7        | 68.9        | 31.0        | 18.6        | 15.5        | 16.7        |
| PriorNet   | 99.9         | 99.9         | 99.7        | 98.3        | 94.1        | 88.5        | 78.6        |         | 90.1         | 73.6        | 61.6        | <b>46.1</b> | <b>38.5</b> | <b>35.6</b> | <b>37.3</b> |
| DDNet      | <b>100.0</b> | <b>100.0</b> | <b>99.9</b> | <b>99.8</b> | <b>98.7</b> | 86.4        | 23.0        |         | 97.3         | <b>90.6</b> | <b>78.7</b> | 39.4        | 13.7        | 6.0         | 5.1         |
| EvNet      | 99.6         | 99.4         | 99.1        | 97.8        | 95.8        | 90.4        | 76.8        |         | 98.0         | 86.2        | 67.4        | 32.7        | 19.9        | 18.2        | 19.7        |
| Sensorless |              |              |             |             |             |             |             | Segment |              |             |             |             |             |             |             |
| PostNet    | 99.7         | 11.7         | 7.3         | 9.3         | 11.8        | 12.5        | 12.5        |         | 99.9         | 73.6        | 40.6        | <b>23.7</b> | <b>17.2</b> | <b>19.8</b> | <b>20.2</b> |
| PriorNet   | 99.8         | 21.4         | 10.4        | 8.5         | 9.0         | 9.2         | 10.3        |         | <b>100.0</b> | 93.7        | 37.7        | 5.8         | 1.1         | 0.9         | 0.8         |
| DDNet      | 99.7         | 18.5         | 5.4         | 4.3         | 4.2         | 5.7         | 7.9         |         | <b>100.0</b> | <b>94.1</b> | 42.9        | 7.2         | 1.0         | 0.0         | 0.0         |
| EvNet      | <b>99.9</b>  | <b>44.8</b>  | <b>29.2</b> | <b>18.2</b> | <b>15.1</b> | <b>14.9</b> | <b>15.5</b> |         | <b>100.0</b> | 93.7        | <b>48.7</b> | 8.7         | 2.4         | 1.6         | 0.5         |

Table 14: Certainty based on differential entropy under Noise label attacks (AUC-PR).

| Noise Std  | 0.0          | 0.1         | 0.2         | 0.5         | 1.0         | 2.0         | 4.0         |         | 0.0          | 0.1         | 0.2         | 0.5         | 1.0         | 2.0         | 4.0         |
|------------|--------------|-------------|-------------|-------------|-------------|-------------|-------------|---------|--------------|-------------|-------------|-------------|-------------|-------------|-------------|
| MNIST      |              |             |             |             |             |             |             | CIFAR10 |              |             |             |             |             |             |             |
| PostNet    | 99.9         | 99.8        | 99.6        | <b>74.2</b> | <b>7.4</b>  | <b>0.2</b>  | 0.0         |         | <b>98.7</b>  | <b>76.3</b> | 24.3        | 0.4         | 4.9         | 0.0         | 1.7         |
| PriorNet   | 99.9         | 99.9        | <b>99.8</b> | 73.4        | 0.0         | 0.0         | 0.0         |         | 85.0         | 27.8        | 15.9        | <b>20.4</b> | 7.0         | <b>7.7</b>  | <b>8.3</b>  |
| DDNet      | <b>100.0</b> | <b>99.9</b> | 99.4        | 51.1        | 0.6         | 0.1         | 0.0         |         | 96.1         | 61.0        | <b>39.8</b> | 14.2        | <b>11.3</b> | 6.9         | 6.9         |
| EvNet      | 99.5         | 98.4        | 88.5        | 20.2        | 0.9         | 0.0         | 0.0         |         | 97.5         | 66.1        | 21.4        | 7.7         | 2.3         | 3.0         | 3.8         |
| Sensorless |              |             |             |             |             |             |             | Segment |              |             |             |             |             |             |             |
| PostNet    | 99.7         | 0.3         | <b>3.2</b>  | <b>13.3</b> | <b>12.0</b> | <b>11.7</b> | <b>11.7</b> |         | 99.9         | 53.9        | 4.8         | 1.8         | <b>11.2</b> | <b>21.7</b> | <b>21.6</b> |
| PriorNet   | <b>100.0</b> | 0.3         | 0.0         | 0.0         | 0.0         | 7.8         | 11.5        |         | <b>100.0</b> | <b>84.5</b> | 15.6        | 0.0         | 0.0         | 0.0         | 0.0         |
| DDNet      | 99.7         | <b>0.9</b>  | 0.6         | 0.0         | 0.0         | 0.0         | 0.0         |         | <b>100.0</b> | 82.7        | <b>23.9</b> | 0.0         | 0.0         | 0.6         | 0.0         |
| EvNet      | 99.8         | 0.3         | 0.0         | 0.1         | 1.7         | 5.5         | 10.0        |         | <b>100.0</b> | 78.3        | 19.0        | <b>3.5</b>  | 0.5         | 0.0         | 1.7         |

better results when they are attacked by FGSM-attacks (Table 13), but as FGSM attacks provide much weaker adversarial examples than PGD attacks, this cannot be seen as real advantage.

### Can we use uncertainty estimates to detect attacks against the classification decision?

PGD attacks do not explicitly consider uncertainty during the computation of adversarial examples, but they seem to provide perturbed inputs with similar uncertainty as the original input.

Table 15: Attack-Detection based on differential entropy under PGD label attacks (AUC-PR).

| Att. Rad. | MNIST       |             |             |             |             |             | Segment     |             |             |             |             |             |
|-----------|-------------|-------------|-------------|-------------|-------------|-------------|-------------|-------------|-------------|-------------|-------------|-------------|
|           | 0.1         | 0.2         | 0.5         | 1.0         | 2.0         | 4.0         | 0.1         | 0.2         | 0.5         | 1.0         | 2.0         | 4.0         |
| PostNet   | 57.7        | 66.3        | 83.4        | 90.5        | 79.0        | 50.1        | <b>95.6</b> | 73.5        | <b>47.0</b> | <b>42.3</b> | <b>53.4</b> | <b>82.7</b> |
| PriorNet  | <b>67.7</b> | <b>83.2</b> | <b>97.1</b> | <b>96.7</b> | 92.1        | 82.9        | 86.7        | 83.3        | 38.0        | 31.3        | 30.8        | 31.5        |
| DDNet     | 53.4        | 57.1        | 68.5        | 83.9        | <b>96.0</b> | <b>86.3</b> | 76.1        | <b>83.5</b> | 45.4        | 32.4        | 30.8        | 30.8        |
| EvNet     | 54.8        | 59.0        | 68.5        | 75.9        | 72.6        | 59.8        | 94.9        | 80.9        | 41.5        | 32.5        | 31.1        | 31.1        |

Table 16: Attack-Detection based on precision  $\alpha_0$  under PGD label attacks (AUC-PR).

| Att. Rad. | 0.1         | 0.2         | 0.5         | 1.0         | 2.0         | 4.0         | 0.1         | 0.2         | 0.5         | 1.0         | 2.0         | 4.0         |
|-----------|-------------|-------------|-------------|-------------|-------------|-------------|-------------|-------------|-------------|-------------|-------------|-------------|
|           | MNIST       |             |             |             |             |             | CIFAR10     |             |             |             |             |             |
| PostNet   | 63.3        | 75.7        | 92.6        | 95.1        | 75.3        | 39.5        | <b>63.4</b> | <b>66.9</b> | 42.1        | 32.9        | 31.6        | 31.2        |
| PriorNet  | <b>67.6</b> | <b>83.2</b> | <b>97.1</b> | <b>96.9</b> | <b>92.7</b> | <b>84.7</b> | 53.3        | 56.0        | 55.6        | <b>49.2</b> | 42.2        | 35.4        |
| DDNet     | 52.7        | 55.7        | 64.7        | 78.4        | 91.9        | 80.9        | 55.8        | 60.5        | <b>57.3</b> | 38.7        | 32.3        | 31.4        |
| EvNet     | 49.1        | 48.0        | 45.1        | 42.7        | 41.8        | 39.2        | 48.4        | 46.9        | 46.3        | 46.3        | <b>44.5</b> | <b>42.5</b> |
|           | Sensorless  |             |             |             |             |             | Segment     |             |             |             |             |             |
|           | 0.1         | 0.2         | 0.5         | 1.0         | 2.0         | 4.0         | 0.1         | 0.2         | 0.5         | 1.0         | 2.0         | 4.0         |
| PostNet   | 39.8        | 35.8        | 35.4        | <b>52.0</b> | <b>88.2</b> | <b>99.0</b> | <b>94.6</b> | 70.3        | <b>46.3</b> | <b>42.6</b> | <b>54.9</b> | <b>84.0</b> |
| PriorNet  | 40.9        | 35.1        | 32.0        | 31.1        | 30.7        | 30.7        | 82.7        | 82.6        | 39.4        | 31.6        | 30.8        | 30.8        |
| DDNet     | <b>47.7</b> | <b>40.3</b> | 35.3        | 32.8        | 31.3        | 30.8        | 80.0        | <b>86.0</b> | 43.3        | 33.6        | 31.0        | 30.8        |
| EvNet     | 45.4        | 39.7        | <b>36.1</b> | 34.8        | 34.7        | 36.0        | 90.9        | 72.4        | 40.4        | 32.4        | 31.1        | 31.1        |

Table 17: Attack-Detection based on mutual information under PGD label attacks (AUC-PR).

| Att. Rad. | 0.1         | 0.2         | 0.5         | 1.0         | 2.0         | 4.0         | 0.1         | 0.2         | 0.5         | 1.0         | 2.0         | 4.0         |
|-----------|-------------|-------------|-------------|-------------|-------------|-------------|-------------|-------------|-------------|-------------|-------------|-------------|
|           | MNIST       |             |             |             |             |             | CIFAR10     |             |             |             |             |             |
| PostNet   | 42.2        | 37.5        | 36.7        | 54.5        | 70.5        | 70.3        | 52.2        | 52.1        | 50.0        | <b>65.9</b> | <b>76.3</b> | <b>80.7</b> |
| PriorNet  | <b>67.7</b> | <b>83.3</b> | <b>97.1</b> | <b>96.9</b> | 92.6        | <b>84.5</b> | 54.0        | 56.9        | 56.3        | 49.7        | 42.4        | 35.5        |
| DDNet     | 53.1        | 56.3        | 66.5        | 81.0        | <b>94.0</b> | 82.9        | <b>56.0</b> | <b>60.8</b> | <b>57.4</b> | 38.2        | 32.1        | 31.3        |
| EvNet     | 49.1        | 48.0        | 45.2        | 42.9        | 41.9        | 39.3        | 48.7        | 47.3        | 46.3        | 46.0        | 44.1        | 42.2        |
|           | Sensorless  |             |             |             |             |             | Segment     |             |             |             |             |             |
|           | 0.1         | 0.2         | 0.5         | 1.0         | 2.0         | 4.0         | 0.1         | 0.2         | 0.5         | 1.0         | 2.0         | 4.0         |
| PostNet   | <b>75.3</b> | <b>76.6</b> | <b>66.5</b> | <b>57.7</b> | <b>85.6</b> | <b>98.7</b> | <b>94.8</b> | 73.5        | <b>55.9</b> | <b>47.9</b> | <b>58.0</b> | <b>84.0</b> |
| PriorNet  | 40.7        | 35.0        | 32.0        | 31.0        | 30.7        | 30.7        | 83.5        | 82.7        | 39.2        | 31.6        | 30.8        | 30.8        |
| DDNet     | 48.0        | 40.0        | 35.2        | 32.6        | 31.2        | 30.8        | 82.4        | <b>88.1</b> | 43.4        | 33.4        | 30.9        | 30.8        |
| EvNet     | 45.5        | 39.7        | 36.1        | 34.8        | 34.7        | 36.0        | 91.7        | 72.9        | 40.5        | 32.4        | 31.1        | 31.1        |

FGSM and Noise attacks are easier to detect, but also weaker than PGD attacks. This suggests that DBU models are capable of detecting weak attacks by using uncertainty estimation.

Table 18: Attack-Detection based on differential entropy under FGSM label attacks (AUC-PR).

| Att. Rad. | 0.1         | 0.2         | 0.5         | 1.0         | 2.0         | 4.0         | 0.1         | 0.2         | 0.5         | 1.0         | 2.0          | 4.0          |
|-----------|-------------|-------------|-------------|-------------|-------------|-------------|-------------|-------------|-------------|-------------|--------------|--------------|
|           | MNIST       |             |             |             |             |             | CIFAR10     |             |             |             |              |              |
| PostNet   | 55.9        | 61.8        | 74.8        | 84.0        | 88.9        | 89.9        | <b>62.1</b> | <b>67.2</b> | 65.7        | 63.1        | 65.4         | 73.8         |
| PriorNet  | <b>67.4</b> | <b>82.4</b> | <b>96.9</b> | <b>98.3</b> | <b>98.9</b> | <b>99.6</b> | 58.4        | 63.1        | 68.5        | <b>70.1</b> | 68.5         | 62.5         |
| DDNet     | 53.6        | 57.3        | 68.3        | 82.6        | 95.6        | 98.7        | 57.2        | 62.9        | <b>69.1</b> | 68.7        | <b>69.7</b>  | <b>76.5</b>  |
| EvNet     | 54.1        | 57.4        | 63.8        | 67.6        | 68.6        | 69.9        | 57.8        | 61.7        | 63.3        | 62.9        | 65.7         | 72.5         |
|           | Sensorless  |             |             |             |             |             | Segment     |             |             |             |              |              |
|           | 0.1         | 0.2         | 0.5         | 1.0         | 2.0         | 4.0         | 0.1         | 0.2         | 0.5         | 1.0         | 2.0          | 4.0          |
| PostNet   | <b>98.4</b> | <b>99.8</b> | <b>99.9</b> | <b>99.9</b> | <b>99.9</b> | <b>99.9</b> | <b>96.9</b> | <b>93.9</b> | <b>99.5</b> | <b>99.9</b> | <b>100.0</b> | <b>100.0</b> |
| PriorNet  | 48.7        | 38.6        | 32.7        | 32.9        | 38.6        | 44.3        | 89.0        | 80.8        | 46.7        | 37.2        | 33.7         | 32.4         |
| DDNet     | 61.5        | 47.8        | 37.1        | 33.1        | 32.4        | 33.2        | 79.6        | 86.2        | 60.2        | 47.5        | 36.6         | 31.6         |
| EvNet     | 67.3        | 65.5        | 72.3        | 73.4        | 75.3        | 79.1        | 95.7        | 87.2        | 59.3        | 51.7        | 51.1         | 53.5         |

Table 19: Attack-Detection based on differential entropy under Noise label attacks (AUC-PR).

| Noise Std. | 0.1         | 0.2          | 0.5          | 1.0          | 2.0          | 4.0          |  | 0.1         | 0.2         | 0.5          | 1.0          | 2.0          | 4.0          |
|------------|-------------|--------------|--------------|--------------|--------------|--------------|--|-------------|-------------|--------------|--------------|--------------|--------------|
| MNIST      |             |              |              |              |              |              |  | CIFAR10     |             |              |              |              |              |
| PostNet    | 51.3        | 65.3         | 93.8         | 95.1         | 95.2         | 95.2         |  | <b>80.8</b> | <b>84.5</b> | <b>97.6</b>  | <b>99.5</b>  | 99.3         | 98.2         |
| PriorNet   | 32.5        | 36.8         | 88.9         | 99.6         | 99.7         | 92.7         |  | 34.7        | 32.3        | 34.3         | 60.3         | 95.5         | <b>100.0</b> |
| DDNet      | <b>60.7</b> | <b>87.6</b>  | <b>99.8</b>  | <b>100.0</b> | <b>99.9</b>  | <b>99.8</b>  |  | 59.1        | 62.6        | 81.5         | 98.6         | <b>99.8</b>  | 98.7         |
| EvNet      | 51.2        | 55.7         | 66.9         | 70.3         | 68.0         | 67.1         |  | 75.7        | 78.6        | 88.2         | 97.8         | 96.4         | 95.6         |
| Sensorless |             |              |              |              |              |              |  | Segment     |             |              |              |              |              |
| PostNet    | <b>99.8</b> | <b>100.0</b> | <b>100.0</b> | <b>100.0</b> | <b>100.0</b> | <b>100.0</b> |  | <b>95.6</b> | <b>99.4</b> | <b>100.0</b> | <b>100.0</b> | <b>100.0</b> | <b>100.0</b> |
| PriorNet   | 42.0        | 33.8         | 31.5         | 34.7         | 43.7         | 47.0         |  | 56.7        | 56.7        | 39.8         | 33.7         | 31.9         | 33.7         |
| DDNet      | 53.4        | 43.5         | 34.3         | 31.6         | 32.5         | 36.1         |  | 57.0        | 58.9        | 43.1         | 33.7         | 31.5         | 31.3         |
| EvNet      | 67.1        | 78.8         | 88.3         | 95.4         | 96.9         | 97.8         |  | 60.8        | 63.5        | 61.2         | 64.8         | 73.7         | 85.2         |

## A.4.2 ATTACKING UNCERTAINTY ESTIMATION

## Are uncertainty estimates a robust feature for OOD detection?

Using uncertainty estimation to distinguish between ID and OOD data is not robust as shown in the following tables.

Table 20: OOD detection based on differential entropy under PGD uncertainty attacks against differential entropy on ID data and OOD data (AUC-PR).

| Att. Rad.             | ID-Attack (non-attacked OOD) |             |             |             |             |             |             | OOD-Attack (non-attacked ID) |             |             |             |             |             |             |
|-----------------------|------------------------------|-------------|-------------|-------------|-------------|-------------|-------------|------------------------------|-------------|-------------|-------------|-------------|-------------|-------------|
|                       | 0.0                          | 0.1         | 0.2         | 0.5         | 1.0         | 2.0         | 4.0         | 0.0                          | 0.1         | 0.2         | 0.5         | 1.0         | 2.0         | 4.0         |
| MNIST – KMNIST        |                              |             |             |             |             |             |             |                              |             |             |             |             |             |             |
| PostNet               | 94.5                         | 94.1        | 93.9        | 91.1        | 77.1        | 44.0        | 31.9        | 94.5                         | 93.1        | 91.4        | 82.1        | 62.2        | 50.7        | 48.8        |
| PriorNet              | <b>99.6</b>                  | <b>99.4</b> | <b>99.1</b> | <b>97.8</b> | <b>93.8</b> | <b>77.6</b> | <b>32.0</b> | <b>99.6</b>                  | <b>99.4</b> | <b>99.1</b> | 98.0        | 94.6        | 85.5        | <b>73.9</b> |
| DDNet                 | 99.3                         | 99.1        | 98.9        | <b>97.8</b> | 93.5        | 63.3        | 30.7        | 99.3                         | 99.1        | 99.0        | <b>98.3</b> | <b>96.7</b> | <b>91.3</b> | 73.8        |
| EvNet                 | 69.0                         | 67.1        | 65.6        | 61.8        | 57.4        | 50.9        | 43.6        | 69.0                         | 55.8        | 48.0        | 39.4        | 36.2        | 34.9        | 34.4        |
| Seg. – Seg. class sky |                              |             |             |             |             |             |             |                              |             |             |             |             |             |             |
| PostNet               | <b>99.0</b>                  | <b>80.7</b> | <b>53.5</b> | <b>38.0</b> | <b>34.0</b> | <b>41.6</b> | <b>49.5</b> | <b>99.0</b>                  | <b>88.4</b> | 69.2        | 45.1        | <b>36.4</b> | <b>42.6</b> | <b>75.4</b> |
| PriorNet              | 34.8                         | 31.4        | 30.9        | 30.8        | 30.8        | 30.8        | 30.8        | 34.8                         | 31.8        | 31.0        | 30.8        | 30.8        | 30.8        | 32.1        |
| DDNet                 | 31.5                         | 30.9        | 30.8        | 30.8        | 30.8        | 30.8        | 30.8        | 31.5                         | 31.0        | 30.8        | 30.8        | 30.8        | 30.8        | 30.8        |
| EvNet                 | 92.5                         | 67.2        | 43.2        | 31.6        | 30.9        | 30.9        | 31.2        | 92.5                         | 86.1        | <b>82.7</b> | <b>48.9</b> | 32.7        | 30.9        | 30.9        |

Table 21: OOD detection under PGD uncertainty attacks against differential entropy on ID data and OOD data (AUC-ROC).

| Att. Rad.                  | ID-Attack (non-attacked OOD) |             |             |             |             |             |             | OOD-Attack (non-attacked ID) |             |             |             |             |             |             |
|----------------------------|------------------------------|-------------|-------------|-------------|-------------|-------------|-------------|------------------------------|-------------|-------------|-------------|-------------|-------------|-------------|
|                            | 0.0                          | 0.1         | 0.2         | 0.5         | 1.0         | 2.0         | 4.0         | 0.0                          | 0.1         | 0.2         | 0.5         | 1.0         | 2.0         | 4.0         |
| MNIST – KMNIST             |                              |             |             |             |             |             |             |                              |             |             |             |             |             |             |
| PostNet                    | 91.6                         | 91.3        | 91.9        | 91.5        | 80.2        | 38.8        | 9.2         | 91.6                         | 90.4        | 89.0        | 81.6        | 62.6        | 45.0        | 43.1        |
| PriorNet                   | <b>99.8</b>                  | <b>99.7</b> | <b>99.5</b> | <b>99.0</b> | <b>97.1</b> | <b>81.1</b> | 8.7         | <b>99.8</b>                  | <b>99.7</b> | <b>99.6</b> | <b>99.1</b> | <b>97.7</b> | <b>93.0</b> | <b>84.9</b> |
| DDNet                      | 99.2                         | 98.9        | 98.6        | 97.3        | 92.1        | 58.2        | 1.2         | 99.2                         | 99.0        | 98.8        | 97.9        | 95.8        | 89.1        | 69.3        |
| EvNet                      | 81.2                         | 79.6        | 78.2        | 74.6        | 69.5        | 58.7        | <b>43.0</b> | 81.2                         | 67.2        | 54.8        | 35.4        | 25.5        | 20.7        | 18.5        |
| CIFAR10 – SVHN             |                              |             |             |             |             |             |             |                              |             |             |             |             |             |             |
| PostNet                    | 87.0                         | 71.9        | 56.3        | <b>30.2</b> | <b>20.2</b> | <b>15.0</b> | <b>9.7</b>  | 87.0                         | 71.0        | 54.3        | 33.5        | 30.3        | 26.2        | 19.4        |
| PriorNet                   | 62.4                         | 48.2        | 35.9        | 13.8        | 3.6         | 0.9         | 0.3         | 62.4                         | 48.0        | 35.6        | 14.8        | 6.6         | 3.4         | 1.6         |
| DDNet                      | <b>87.0</b>                  | <b>76.0</b> | <b>63.6</b> | 29.3        | 6.1         | 1.1         | 0.4         | <b>87.0</b>                  | <b>78.1</b> | <b>66.1</b> | 26.2        | 5.1         | 0.7         | 0.1         |
| EvNet                      | <b>88.0</b>                  | 69.1        | 51.7        | 24.6        | 15.5        | 9.5         | 4.2         | <b>88.0</b>                  | 72.0        | 60.7        | <b>47.9</b> | <b>42.1</b> | <b>33.3</b> | <b>24.0</b> |
| Sens. – Sens. class 10, 11 |                              |             |             |             |             |             |             |                              |             |             |             |             |             |             |
| PostNet                    | <b>85.3</b>                  | <b>49.1</b> | <b>38.1</b> | <b>7.8</b>  | <b>8.2</b>  | 8.2         | 8.2         | <b>85.3</b>                  | <b>57.2</b> | <b>54.0</b> | <b>27.3</b> | <b>31.5</b> | <b>86.7</b> | <b>99.5</b> |
| PriorNet                   | 28.1                         | 0.8         | 0.3         | 0.4         | 1.6         | <b>8.4</b>  | <b>26.8</b> | 28.1                         | 2.5         | 0.7         | 0.2         | 2.3         | 18.9        | 41.0        |
| DDNet                      | 21.0                         | 3.0         | 0.9         | 0.4         | 0.6         | 2.1         | 7.3         | 21.0                         | 4.4         | 2.1         | 1.9         | 2.2         | 2.2         | 4.1         |
| EvNet                      | 74.2                         | 21.4        | 12.2        | 4.3         | 1.4         | 0.6         | 0.3         | 74.2                         | 45.3        | 38.5        | 19.6        | 9.6         | 12.1        | 26.0        |
| Seg. – Seg. class sky      |                              |             |             |             |             |             |             |                              |             |             |             |             |             |             |
| PostNet                    | <b>99.2</b>                  | <b>84.7</b> | <b>55.5</b> | <b>23.0</b> | <b>9.7</b>  | <b>4.4</b>  | <b>4.7</b>  | <b>99.2</b>                  | <b>92.1</b> | <b>77.1</b> | 41.5        | <b>24.9</b> | <b>41.0</b> | <b>80.8</b> |
| PriorNet                   | 17.1                         | 4.4         | 1.3         | 0.0         | 0.0         | 0.0         | 0.1         | 17.1                         | 5.9         | 1.5         | 0.1         | 0.0         | 0.1         | 5.8         |
| DDNet                      | 4.1                          | 1.1         | 0.0         | 0.0         | 0.0         | 0.0         | 0.0         | 4.1                          | 1.8         | 0.4         | 0.0         | 0.0         | 0.0         | 0.0         |
| EvNet                      | 91.2                         | 54.5        | 23.3        | 3.9         | 0.9         | 0.4         | 0.2         | 91.2                         | 82.9        | 76.4        | <b>42.2</b> | 9.7         | 0.8         | 0.6         |



Table 22: OOD detection (AU-PR) under PGD uncertainty attacks against precision  $\alpha_0$  on ID data and OOD data.

| Att. Rad.                         | ID-Attack (non-attacked OOD) |             |             |             |             |             |             | OOD-Attack (non-attacked ID) |             |             |             |             |             |             |
|-----------------------------------|------------------------------|-------------|-------------|-------------|-------------|-------------|-------------|------------------------------|-------------|-------------|-------------|-------------|-------------|-------------|
|                                   | 0.0                          | 0.1         | 0.2         | 0.5         | 1.0         | 2.0         | 4.0         | 0.0                          | 0.1         | 0.2         | 0.5         | 1.0         | 2.0         | 4.0         |
| <b>MNIST – KMNIST</b>             |                              |             |             |             |             |             |             |                              |             |             |             |             |             |             |
| PostNet                           | 98.4                         | 97.4        | 96.0        | 88.8        | 70.9        | 39.3        | 31.3        | 98.4                         | 97.2        | 95.2        | 82.8        | 52.6        | 34.3        | 32.1        |
| PriorNet                          | <b>99.6</b>                  | <b>99.5</b> | <b>99.2</b> | <b>98.0</b> | <b>94.1</b> | <b>76.0</b> | 31.1        | <b>99.6</b>                  | <b>99.5</b> | <b>99.2</b> | <b>98.2</b> | <b>95.3</b> | <b>87.5</b> | <b>75.6</b> |
| DDNet                             | 97.2                         | 96.7        | 96.1        | 93.8        | 86.4        | 53.2        | 31.0        | 97.2                         | 96.7        | 96.2        | 94.5        | 91.1        | 82.9        | 64.6        |
| EvNet                             | 39.8                         | 39.2        | 38.8        | 37.9        | 37.1        | 36.3        | <b>35.4</b> | 39.8                         | 34.5        | 32.5        | 31.2        | 31.0        | 30.9        | 31.0        |
| <b>CIFAR10 – SVHN</b>             |                              |             |             |             |             |             |             |                              |             |             |             |             |             |             |
| PostNet                           | <b>82.4</b>                  | 63.8        | 46.1        | 22.3        | 17.4        | 16.7        | 16.4        | <b>82.4</b>                  | 61.8        | 41.5        | 21.8        | <b>19.8</b> | <b>17.5</b> | <b>15.8</b> |
| PriorNet                          | 37.9                         | 25.0        | 19.2        | 15.8        | 15.4        | 15.4        | 15.4        | 37.9                         | 25.9        | 19.4        | 15.6        | 15.4        | 15.4        | 15.4        |
| DDNet                             | 81.1                         | <b>70.1</b> | <b>58.4</b> | <b>30.0</b> | 16.7        | 15.5        | 15.4        | 81.1                         | <b>71.2</b> | <b>59.9</b> | <b>27.8</b> | 16.5        | 15.5        | 15.4        |
| EvNet                             | 34.7                         | 27.4        | 25.4        | 22.0        | <b>19.7</b> | <b>18.1</b> | <b>17.1</b> | 34.7                         | 19.4        | 18.1        | 17.1        | 16.8        | 16.2        | 15.7        |
| <b>Sens. – Sens. class 10, 11</b> |                              |             |             |             |             |             |             |                              |             |             |             |             |             |             |
| PostNet                           | <b>77.4</b>                  | <b>39.6</b> | <b>35.9</b> | <b>31.7</b> | <b>44.4</b> | <b>44.4</b> | <b>44.4</b> | <b>77.4</b>                  | 40.3        | <b>38.6</b> | 29.5        | <b>34.0</b> | <b>79.4</b> | <b>97.4</b> |
| PriorNet                          | 35.9                         | 27.0        | 26.8        | 26.8        | 27.5        | 36.2        |             | 35.9                         | 27.7        | 27.0        | 26.7        | 26.6        | 26.5        | 26.5        |
| DDNet                             | 55.6                         | 34.4        | 31.7        | 30.4        | 29.5        | 30.2        | 33.4        | 55.6                         | <b>40.9</b> | 34.1        | 28.0        | 26.9        | 26.6        | 26.5        |
| EvNet                             | 66.3                         | 33.3        | 29.7        | 27.0        | 27.1        | 29.2        | 33.9        | 66.3                         | 39.3        | 37.1        | <b>31.3</b> | 28.3        | 28.4        | 29.7        |
| <b>Seg. – Seg. class sky</b>      |                              |             |             |             |             |             |             |                              |             |             |             |             |             |             |
| PostNet                           | <b>98.4</b>                  | 74.8        | 51.0        | <b>37.2</b> | <b>32.8</b> | <b>43.5</b> | <b>49.9</b> | <b>98.4</b>                  | 84.7        | 66.1        | 42.4        | 34.8        | <b>40.9</b> | <b>71.2</b> |
| PriorNet                          | 32.1                         | 30.9        | 30.8        | 30.8        | 30.8        | 30.8        | 30.8        | 32.1                         | 31.0        | 30.8        | 30.8        | 30.8        | 30.8        | 30.8        |
| DDNet                             | 31.0                         | 30.8        | 30.8        | 30.8        | 30.8        | 30.8        | 30.8        | 31.0                         | 30.8        | 30.8        | 30.8        | 30.8        | 30.8        | 30.8        |
| EvNet                             | 98.3                         | <b>83.0</b> | <b>60.5</b> | 34.0        | 31.0        | 30.8        | 30.8        | 98.3                         | <b>94.4</b> | <b>88.8</b> | <b>65.6</b> | <b>37.0</b> | 31.4        | 30.9        |

Table 23: OOD detection (AUC-ROC) under PGD uncertainty attacks against precision  $\alpha_0$  on ID data and OOD data.

| Att. Rad.                         | ID-Attack (non-attacked OOD) |             |             |             |             |             |             | OOD-Attack (non-attacked ID) |             |             |             |             |             |             |
|-----------------------------------|------------------------------|-------------|-------------|-------------|-------------|-------------|-------------|------------------------------|-------------|-------------|-------------|-------------|-------------|-------------|
|                                   | 0.0                          | 0.1         | 0.2         | 0.5         | 1.0         | 2.0         | 4.0         | 0.0                          | 0.1         | 0.2         | 0.5         | 1.0         | 2.0         | 4.0         |
| <b>MNIST – KMNIST</b>             |                              |             |             |             |             |             |             |                              |             |             |             |             |             |             |
| PostNet                           | 98.4                         | 97.6        | 96.4        | 90.9        | 74.0        | 28.9        | 6.3         | 98.4                         | 97.6        | 96.3        | 89.0        | 61.3        | 19.6        | 9.7         |
| PriorNet                          | <b>99.8</b>                  | <b>99.7</b> | <b>99.6</b> | <b>99.1</b> | <b>97.2</b> | <b>79.4</b> | 4.4         | <b>99.8</b>                  | <b>99.7</b> | <b>99.6</b> | <b>99.2</b> | <b>98.0</b> | <b>93.9</b> | <b>85.8</b> |
| DDNet                             | 96.5                         | 95.9        | 95.1        | 92.0        | 82.6        | 44.3        | 3.5         | 96.5                         | 95.9        | 95.2        | 92.9        | 88.6        | 78.7        | 59.4        |
| EvNet                             | 35.9                         | 34.1        | 32.8        | 30.1        | 27.4        | 24.6        | <b>21.4</b> | 35.9                         | 18.7        | 10.4        | 3.7         | 2.0         | 1.7         | 2.0         |
| <b>CIFAR10 – SVHN</b>             |                              |             |             |             |             |             |             |                              |             |             |             |             |             |             |
| PostNet                           | <b>87.4</b>                  | 71.2        | 54.8        | 29.2        | 19.0        | 14.0        | 9.4         | <b>87.4</b>                  | 71.4        | 54.1        | 30.1        | <b>25.8</b> | <b>17.5</b> | <b>5.8</b>  |
| PriorNet                          | 45.6                         | 31.1        | 20.4        | 6.3         | 1.4         | 0.3         | 0.1         | 45.6                         | 32.2        | 21.7        | 5.4         | 1.0         | 0.3         | 0.1         |
| DDNet                             | 84.9                         | <b>73.8</b> | <b>61.8</b> | 30.2        | 9.3         | 3.0         | 0.8         | 84.9                         | <b>76.6</b> | <b>66.2</b> | <b>34.6</b> | 10.4        | 2.3         | 0.3         |
| EvNet                             | 61.2                         | 49.4        | 45.2        | <b>37.6</b> | <b>30.5</b> | <b>23.4</b> | <b>17.0</b> | 61.2                         | 29.4        | 23.0        | 16.8        | 14.2        | 10.2        | 5.5         |
| <b>Sens. – Sens. class 10, 11</b> |                              |             |             |             |             |             |             |                              |             |             |             |             |             |             |
| PostNet                           | <b>87.2</b>                  | <b>48.8</b> | <b>37.3</b> | 4.1         | 0.7         | 0.7         | 0.7         | <b>87.2</b>                  | <b>50.0</b> | <b>45.4</b> | 16.5        | <b>27.6</b> | <b>81.9</b> | <b>98.0</b> |
| PriorNet                          | 37.3                         | 3.5         | 2.4         | 2.2         | 2.9         | 6.3         | <b>19.2</b> | 37.3                         | 8.0         | 3.6         | 1.4         | 0.6         | 0.1         | 0.0         |
| DDNet                             | 55.2                         | 23.7        | 17.7        | <b>14.1</b> | <b>12.5</b> | <b>12.7</b> | 15.7        | 55.2                         | 37.1        | 27.7        | 9.4         | 2.5         | 0.6         | 0.1         |
| EvNet                             | 75.5                         | 30.8        | 18.2        | 5.8         | 1.6         | 0.6         | 0.2         | 75.5                         | 47.8        | 41.9        | <b>24.1</b> | 10.2        | 10.2        | 15.6        |
| <b>Seg. – Seg. class sky</b>      |                              |             |             |             |             |             |             |                              |             |             |             |             |             |             |
| PostNet                           | <b>98.6</b>                  | 77.7        | <b>50.8</b> | <b>20.3</b> | <b>8.2</b>  | <b>1.3</b>  | <b>0.5</b>  | <b>98.6</b>                  | 88.9        | 73.4        | 36.2        | 19.4        | <b>36.7</b> | <b>75.2</b> |
| PriorNet                          | 8.5                          | 1.3         | 0.2         | 0.0         | 0.0         | 0.0         | 0.1         | 8.5                          | 2.0         | 0.4         | 0.0         | 0.0         | 0.0         | 0.0         |
| DDNet                             | 2.2                          | 0.3         | 0.0         | 0.0         | 0.0         | 0.0         | 0.0         | 2.2                          | 0.5         | 0.1         | 0.0         | 0.0         | 0.0         | 0.0         |
| EvNet                             | 97.7                         | <b>78.4</b> | 47.7        | 9.9         | 1.2         | 0.2         | 0.1         | 97.7                         | <b>93.5</b> | <b>86.9</b> | <b>62.2</b> | <b>21.5</b> | 3.7         | 1.0         |

Table 24: OOD detection (AU-PR) under PGD uncertainty attacks against distributional uncertainty on ID data and OOD data.

| Att. Rad.                         | ID-Attack (non-attacked OOD) |             |             |             |             |             |             | OOD-Attack (non-attacked ID) |             |             |             |             |             |             |
|-----------------------------------|------------------------------|-------------|-------------|-------------|-------------|-------------|-------------|------------------------------|-------------|-------------|-------------|-------------|-------------|-------------|
|                                   | 0.0                          | 0.1         | 0.2         | 0.5         | 1.0         | 2.0         | 4.0         | 0.0                          | 0.1         | 0.2         | 0.5         | 1.0         | 2.0         | 4.0         |
| <b>MNIST – KMIST</b>              |                              |             |             |             |             |             |             |                              |             |             |             |             |             |             |
| PostNet                           | 80.5                         | 76.2        | 73.4        | 69.1        | 66.6        | 65.4        | <b>60.2</b> | 80.5                         | 72.1        | 63.9        | 43.9        | 33.0        | 30.9        | 30.8        |
| PriorNet                          | <b>99.6</b>                  | <b>99.4</b> | <b>99.2</b> | <b>98.0</b> | <b>94.1</b> | <b>76.3</b> | 31.2        | <b>99.6</b>                  | <b>99.4</b> | <b>99.2</b> | <b>98.2</b> | <b>95.2</b> | <b>87.2</b> | <b>75.2</b> |
| DDNet                             | 98.4                         | 98.1        | 97.7        | 95.8        | 89.5        | 56.2        | 30.9        | 98.4                         | 98.1        | 97.8        | 96.5        | 93.8        | 86.3        | 67.7        |
| EvNet                             | 40.1                         | 39.5        | 39.1        | 38.2        | 37.3        | 36.5        | 35.6        | 40.1                         | 34.6        | 32.6        | 31.3        | 31.0        | 31.0        | 31.1        |
| <b>CIFAR10 – SVHN</b>             |                              |             |             |             |             |             |             |                              |             |             |             |             |             |             |
| PostNet                           | 64.2                         | 44.7        | 37.5        | <b>31.1</b> | <b>28.5</b> | <b>25.0</b> | <b>19.3</b> | 64.2                         | 31.0        | 19.5        | 16.3        | 16.4        | <b>16.5</b> | <b>16.3</b> |
| PriorNet                          | 40.8                         | 27.4        | 20.4        | 15.9        | 15.4        | 15.4        | 15.4        | 40.8                         | 28.3        | 21.1        | 15.9        | 15.4        | 15.4        | 15.4        |
| DDNet                             | <b>82.0</b>                  | <b>71.0</b> | <b>59.1</b> | 29.9        | 16.6        | 15.5        | 15.4        | <b>82.0</b>                  | <b>72.2</b> | <b>60.3</b> | <b>26.3</b> | 16.2        | 15.4        | 15.4        |
| EvNet                             | 36.4                         | 28.7        | 26.5        | 22.8        | 20.2        | 18.4        | 17.2        | 36.4                         | 19.8        | 18.3        | 17.2        | <b>16.9</b> | 16.2        | 15.7        |
| <b>Sens. – Sens. class 10, 11</b> |                              |             |             |             |             |             |             |                              |             |             |             |             |             |             |
| PostNet                           | <b>79.1</b>                  | <b>40.3</b> | <b>35.9</b> | <b>33.0</b> | <b>45.5</b> | <b>45.5</b> | 45.5        | <b>79.1</b>                  | <b>47.3</b> | <b>43.7</b> | <b>36.5</b> | <b>37.9</b> | <b>74.6</b> | <b>96.5</b> |
| PriorNet                          | 35.5                         | 26.8        | 26.7        | 26.9        | 29.6        | 43.7        | <b>68.7</b> | 35.5                         | 27.5        | 26.9        | 26.7        | 26.6        | 26.5        | 26.5        |
| DDNet                             | 52.9                         | 31.7        | 29.8        | 29.1        | 28.4        | 30.1        | 37.6        | 52.9                         | 38.4        | 31.5        | 27.5        | 26.8        | 26.6        | 26.5        |
| EvNet                             | 66.3                         | 33.3        | 29.6        | 27.0        | 27.2        | 29.3        | 35.2        | 66.3                         | 39.3        | 37.1        | 31.3        | 28.3        | 28.4        | 29.7        |
| <b>Seg. – Seg. class sky</b>      |                              |             |             |             |             |             |             |                              |             |             |             |             |             |             |
| PostNet                           | 98.0                         | 76.3        | 53.1        | <b>37.4</b> | <b>32.9</b> | <b>44.6</b> | <b>50.2</b> | 98.0                         | 83.5        | 64.8        | 41.8        | 35.4        | <b>43.1</b> | <b>71.3</b> |
| PriorNet                          | 32.3                         | 30.9        | 30.8        | 30.8        | 30.8        | 32.5        | 45.0        | 32.3                         | 31.0        | 30.8        | 30.8        | 30.8        | 30.8        | 30.8        |
| DDNet                             | 30.9                         | 30.8        | 30.8        | 30.8        | 30.8        | 30.8        | 30.8        | 30.9                         | 30.8        | 30.8        | 30.8        | 30.8        | 30.8        | 30.8        |
| EvNet                             | <b>98.1</b>                  | <b>82.1</b> | <b>59.1</b> | 33.8        | 31.0        | 30.8        | 30.8        | <b>98.1</b>                  | <b>93.8</b> | <b>88.2</b> | <b>64.5</b> | <b>36.4</b> | 31.3        | 31.0        |

Table 25: OOD detection (AUC-ROC) under PGD uncertainty attacks against distributional uncertainty on ID data and OOD data.

| Att. Rad.                         | ID-Attack (non-attacked OOD) |             |             |             |             |             |             | OOD-Attack (non-attacked ID) |             |             |             |             |             |             |
|-----------------------------------|------------------------------|-------------|-------------|-------------|-------------|-------------|-------------|------------------------------|-------------|-------------|-------------|-------------|-------------|-------------|
|                                   | 0.0                          | 0.1         | 0.2         | 0.5         | 1.0         | 2.0         | 4.0         | 0.0                          | 0.1         | 0.2         | 0.5         | 1.0         | 2.0         | 4.0         |
| <b>MNIST – KMIST</b>              |                              |             |             |             |             |             |             |                              |             |             |             |             |             |             |
| PostNet                           | 90.1                         | 88.0        | 86.2        | 82.2        | 79.0        | 77.1        | <b>66.1</b> | 90.1                         | 84.5        | 77.2        | 46.4        | 12.9        | 2.7         | 2.4         |
| PriorNet                          | <b>99.8</b>                  | <b>99.7</b> | <b>99.6</b> | <b>99.1</b> | <b>97.2</b> | <b>79.7</b> | 4.7         | <b>99.8</b>                  | <b>99.7</b> | <b>99.6</b> | <b>99.2</b> | <b>97.9</b> | <b>93.7</b> | <b>85.6</b> |
| DDNet                             | 98.1                         | 97.7        | 97.2        | 94.8        | 87.0        | 48.7        | 3.0         | 98.1                         | 97.8        | 97.3        | 95.8        | 92.3        | 83.3        | 63.3        |
| EvNet                             | 36.8                         | 35.0        | 33.7        | 30.9        | 28.2        | 25.3        | 22.1        | 36.8                         | 19.3        | 10.7        | 3.9         | 2.1         | 1.8         | 2.2         |
| <b>CIFAR10 – SVHN</b>             |                              |             |             |             |             |             |             |                              |             |             |             |             |             |             |
| PostNet                           | 82.9                         | 67.7        | 59.2        | <b>51.3</b> | <b>47.7</b> | <b>40.1</b> | <b>24.2</b> | 82.9                         | 51.9        | 26.2        | 8.9         | 9.5         | <b>11.1</b> | <b>9.9</b>  |
| PriorNet                          | 48.0                         | 33.6        | 22.5        | 7.1         | 1.6         | 0.3         | 0.1         | 48.0                         | 34.8        | 24.0        | 6.7         | 1.6         | 0.6         | 0.2         |
| DDNet                             | <b>85.9</b>                  | <b>74.9</b> | <b>62.7</b> | 30.1        | 8.3         | 2.3         | 0.6         | <b>85.9</b>                  | <b>77.6</b> | <b>66.9</b> | <b>32.1</b> | 8.0         | 1.5         | 0.2         |
| EvNet                             | 63.3                         | 51.4        | 47.1        | 39.3        | 32.1        | 24.9        | 17.9        | 63.3                         | 31.1        | 24.4        | 17.7        | <b>15.0</b> | 10.7        | 5.7         |
| <b>Sens. – Sens. class 10, 11</b> |                              |             |             |             |             |             |             |                              |             |             |             |             |             |             |
| PostNet                           | <b>87.1</b>                  | <b>50.9</b> | <b>37.8</b> | 5.5         | 4.5         | 4.5         | 4.5         | <b>87.1</b>                  | <b>55.3</b> | <b>51.1</b> | <b>34.4</b> | <b>38.9</b> | <b>79.7</b> | <b>97.9</b> |
| PriorNet                          | 36.5                         | 2.9         | 1.8         | 1.8         | 5.2         | <b>21.5</b> | <b>52.8</b> | 36.5                         | 7.3         | 3.0         | 1.3         | 0.5         | 0.1         | 0.0         |
| DDNet                             | 52.3                         | 18.7        | 13.1        | <b>10.3</b> | <b>9.3</b>  | 10.8        | 18.4        | 52.3                         | 33.1        | 22.0        | 6.7         | 2.2         | 0.6         | 0.1         |
| EvNet                             | 75.5                         | 30.7        | 18.1        | 5.8         | 1.6         | 0.6         | 0.8         | 75.5                         | 47.7        | 41.8        | 23.8        | 10.3        | 10.2        | 15.8        |
| <b>Seg. – Seg. class sky</b>      |                              |             |             |             |             |             |             |                              |             |             |             |             |             |             |
| PostNet                           | <b>98.6</b>                  | <b>78.3</b> | <b>51.9</b> | <b>20.5</b> | <b>8.3</b>  | <b>2.1</b>  | 1.7         | <b>98.6</b>                  | 88.8        | 73.1        | 35.9        | <b>21.4</b> | <b>39.9</b> | <b>75.9</b> |
| PriorNet                          | 9.4                          | 1.6         | 0.3         | 0.0         | 0.0         | 1.8         | <b>15.4</b> | 9.4                          | 2.4         | 0.4         | 0.0         | 0.0         | 0.0         | 0.0         |
| DDNet                             | 1.3                          | 0.2         | 0.0         | 0.0         | 0.0         | 0.0         | 0.0         | 1.3                          | 0.2         | 0.0         | 0.0         | 0.0         | 0.0         | 0.0         |
| EvNet                             | 97.4                         | 77.1        | 45.9        | 9.4         | 1.3         | 0.2         | 0.1         | 97.4                         | <b>92.9</b> | <b>86.1</b> | <b>60.9</b> | 20.4        | 3.0         | 1.2         |

Table 26: OOD detection (AU-PR) under FGSM uncertainty attacks against differential entropy on ID data and OOD data.

| Att. Rad.                         | ID-Attack (non-attacked OOD) |             |             |             |             |             |             | OOD-Attack (non-attacked ID) |             |             |             |             |              |              |
|-----------------------------------|------------------------------|-------------|-------------|-------------|-------------|-------------|-------------|------------------------------|-------------|-------------|-------------|-------------|--------------|--------------|
|                                   | 0.0                          | 0.1         | 0.2         | 0.5         | 1.0         | 2.0         | 4.0         | 0.0                          | 0.1         | 0.2         | 0.5         | 1.0         | 2.0          | 4.0          |
| <b>MNIST – KMNIST</b>             |                              |             |             |             |             |             |             |                              |             |             |             |             |              |              |
| PostNet                           | 94.5                         | 94.2        | 94.1        | 93.5        | 89.9        | 81.2        | <b>71.6</b> | 94.5                         | 93.3        | 92.0        | 87.6        | 81.1        | 75.7         | 75.7         |
| PriorNet                          | <b>99.6</b>                  | <b>99.4</b> | <b>99.2</b> | <b>98.1</b> | <b>95.6</b> | <b>90.0</b> | 65.3        | <b>99.6</b>                  | <b>99.4</b> | <b>99.2</b> | <b>98.6</b> | 97.5        | <b>95.9</b>  | <b>94.4</b>  |
| DDNet                             | 99.3                         | 99.1        | 98.9        | 98.0        | 95.4        | 80.9        | 48.2        | 99.3                         | 99.2        | 99.0        | 98.5        | <b>97.6</b> | 95.5         | 92.0         |
| EvNet                             | 69.0                         | 67.4        | 66.2        | 64.0        | 61.9        | 59.8        | 56.70       | 9.0                          | 60.1        | 56.5        | 53.4        | 52.7        | 52.9         | 53.5         |
| <b>CIFAR10 – SVHN</b>             |                              |             |             |             |             |             |             |                              |             |             |             |             |              |              |
| PostNet                           | 81.8                         | 66.2        | 61.6        | <b>64.2</b> | <b>65.7</b> | 61.3        | 48.4        | 81.8                         | 63.1        | 51.9        | 43.4        | 46.6        | <b>61.7</b>  | <b>77.0</b>  |
| PriorNet                          | 54.4                         | 40.6        | 33.8        | 27.0        | 25.5        | 27.2        | 35.5        | 54.4                         | 42.3        | 36.8        | 30.6        | 28.3        | 29.5         | 32.1         |
| DDNet                             | <b>82.8</b>                  | <b>71.9</b> | <b>64.6</b> | 53.8        | 50.2        | 47.8        | 41.0        | <b>82.8</b>                  | <b>71.5</b> | <b>60.5</b> | 39.1        | 31.4        | 41.2         | 66.6         |
| EvNet                             | 80.3                         | 67.8        | 64.0        | 61.9        | 61.6        | 57.4        | <b>49.6</b> | 80.3                         | 59.2        | 51.5        | <b>46.7</b> | <b>49.0</b> | 56.3         | 64.6         |
| <b>Sens. – Sens. class 10, 11</b> |                              |             |             |             |             |             |             |                              |             |             |             |             |              |              |
| PostNet                           | <b>74.5</b>                  | 40.6        | 37.2        | 31.4        | 38.1        | 44.9        | 45.9        | <b>74.5</b>                  | <b>99.6</b> | <b>99.8</b> | <b>99.9</b> | <b>99.9</b> | <b>99.9</b>  | <b>99.9</b>  |
| PriorNet                          | 32.3                         | 35.7        | <b>57.6</b> | <b>83.1</b> | <b>88.8</b> | 79.7        | 70.0        | 32.3                         | 28.3        | 28.1        | 27.6        | 28.0        | 32.7         | 38.5         |
| DDNet                             | 31.7                         | 31.3        | 44.4        | 70.3        | 87.9        | <b>92.5</b> | <b>91.9</b> | 31.7                         | 28.8        | 29.3        | 29.1        | 27.7        | 27.9         | 28.01        |
| EvNet                             | 66.5                         | <b>45.7</b> | 46.8        | 42.3        | 42.0        | 41.4        | 41.8        | 66.5                         | 54.7        | 66.5        | 76.2        | 71.1        | 75.3         | 75.8         |
| <b>Seg. – Seg. class sky</b>      |                              |             |             |             |             |             |             |                              |             |             |             |             |              |              |
| PostNet                           | <b>99.0</b>                  | <b>80.8</b> | <b>66.4</b> | 43.6        | 37.0        | 35.5        | 43.0        | <b>99.0</b>                  | <b>94.8</b> | <b>92.0</b> | <b>98.5</b> | <b>99.7</b> | <b>100.0</b> | <b>100.0</b> |
| PriorNet                          | 34.8                         | 31.2        | 31.4        | 46.3        | <b>74.0</b> | <b>88.8</b> | <b>94.5</b> | 34.8                         | 31.6        | 31.0        | 31.2        | 30.9        | 30.8         | 30.8         |
| DDNet                             | 31.5                         | 30.8        | 30.8        | 30.9        | 37.9        | 56.2        | 84.3        | 31.5                         | 30.9        | 30.8        | 30.8        | 30.8        | 30.8         | 30.8         |
| EvNet                             | 92.5                         | 64.9        | 54.6        | <b>66.6</b> | 69.5        | 69.6        | 64.6        | 92.5                         | 85.9        | 83.0        | 66.3        | 66.1        | 61.1         | 56.8         |

Table 27: OOD detection (AU-PR) under Noise uncertainty attacks against differential entropy on ID data and OOD data.

| Noise Std                         | ID-Attack (non-attacked OOD) |             |             |             |             |             |             | OOD-Attack (non-attacked ID) |             |              |              |              |              |              |
|-----------------------------------|------------------------------|-------------|-------------|-------------|-------------|-------------|-------------|------------------------------|-------------|--------------|--------------|--------------|--------------|--------------|
|                                   | 0.0                          | 0.1         | 0.2         | 0.5         | 1.0         | 2.0         | 4.0         | 0.0                          | 0.1         | 0.2          | 0.5          | 1.0          | 2.0          | 4.0          |
| <b>MNIST – KMNIST</b>             |                              |             |             |             |             |             |             |                              |             |              |              |              |              |              |
| PostNet                           | 93.0                         | 94.2        | 82.3        | 34.4        | 31.6        | 31.0        | 30.9        | 92.2                         | 91.8        | 91.5         | 92.3         | 92.7         | 93.2         | 93.5         |
| PriorNet                          | <b>99.7</b>                  | <b>99.6</b> | <b>96.7</b> | <b>40.0</b> | <b>40.6</b> | <b>45.7</b> | <b>55.6</b> | <b>99.5</b>                  | 97.3        | 96.5         | 99.4         | <b>100.0</b> | 99.5         | 72.4         |
| DDNet                             | 99.1                         | 97.5        | 81.2        | 31.3        | 31.0        | 30.9        | 31.2        | 99.0                         | <b>98.8</b> | <b>99.2</b>  | <b>99.8</b>  | 99.9         | <b>99.8</b>  | <b>99.1</b>  |
| EvNet                             | 65.5                         | 60.5        | 51.4        | 35.3        | 34.5        | 35.5        | 35.0        | 62.5                         | 47.2        | 40.9         | 35.1         | 34.6         | 33.5         | 34.9         |
| <b>CIFAR10 – SVHN</b>             |                              |             |             |             |             |             |             |                              |             |              |              |              |              |              |
| PostNet                           | 88.5                         | 41.4        | 39.8        | 31.0        | 30.7        | 31.6        | 33.9        | 88.5                         | <b>86.6</b> | <b>81.9</b>  | <b>93.0</b>  | <b>98.5</b>  | 98.6         | 97.3         |
| PriorNet                          | 73.3                         | 88.3        | <b>95.3</b> | <b>92.4</b> | <b>70.4</b> | 30.9        | 30.8        | 73.3                         | 31.6        | 30.9         | 31.7         | 51.8         | 94.3         | <b>100.0</b> |
| DDNet                             | 87.3                         | 69.3        | 78.4        | 55.2        | 31.6        | 30.7        | 31.4        | 87.3                         | 55.8        | 57.9         | 73.9         | 97.3         | <b>99.5</b>  | 97.2         |
| EvNet                             | <b>92.4</b>                  | <b>56.8</b> | 53.8        | 33.4        | 30.9        | <b>32.9</b> | <b>36.6</b> | <b>92.4</b>                  | 73.7        | 73.5         | 77.7         | 93.7         | 92.5         | 92.1         |
| <b>Sens. – Sens. class 10, 11</b> |                              |             |             |             |             |             |             |                              |             |              |              |              |              |              |
| PostNet                           | <b>85.3</b>                  | <b>30.8</b> | <b>39.4</b> | 50.0        | 50.0        | 50.0        | 50.0        | <b>85.3</b>                  | <b>98.9</b> | <b>100.0</b> | <b>100.0</b> | <b>100.0</b> | <b>100.0</b> | <b>100.0</b> |
| PriorNet                          | 32.3                         | <b>30.8</b> | 34.9        | <b>83.7</b> | <b>77.7</b> | 49.8        | <b>80.3</b> | 32.3                         | 30.7        | 30.7         | 32.5         | 40.1         | 49.9         | 47.6         |
| DDNet                             | 31.1                         | 30.7        | 30.7        | 32.4        | 58.8        | <b>88.1</b> | 74.3        | 31.1                         | 30.7        | 30.7         | 30.7         | 30.8         | 31.6         | 39.1         |
| EvNet                             | 80.3                         | <b>30.8</b> | 31.2        | 37.9        | 46.3        | 50.0        | 50.0        | 80.3                         | 34.6        | 38.4         | 53.9         | 69.3         | 78.8         | 81.5         |
| <b>Seg. – Seg. class sky</b>      |                              |             |             |             |             |             |             |                              |             |              |              |              |              |              |
| PostNet                           | <b>99.9</b>                  | <b>41.8</b> | 30.8        | <b>34.5</b> | <b>49.1</b> | 50.0        | 50.0        | <b>99.9</b>                  | <b>97.4</b> | <b>96.6</b>  | <b>99.5</b>  | <b>100.0</b> | <b>100.0</b> | <b>100.0</b> |
| PriorNet                          | 31.0                         | 30.8        | 30.8        | 30.8        | 32.7        | <b>69.0</b> | 78.3        | 31.0                         | 30.8        | 30.8         | 30.8         | 30.9         | 31.1         | 32.4         |
| DDNet                             | 30.8                         | 30.8        | 30.8        | 30.8        | 30.8        | 58.2        | <b>91.3</b> | 30.8                         | 30.8        | 30.8         | 30.8         | 30.8         | 30.8         | 31.9         |
| EvNet                             | 99.1                         | 38.1        | <b>32.2</b> | 30.8        | 30.8        | 32.2        | 37.5        | 99.1                         | 95.6        | 87.6         | 58.0         | 44.9         | 46.6         | 53.8         |

## A.5 ROBUST TRAINING FOR DBU MODELS &amp; ID/OOD VERIFICATION

Table 5 and 29 on adversarial training illustrate that there is a jump between ID-verification and OOD-verification, where robustness on ID data drops while robustness on OOD data increases. These jumps are observed for each model and each training (normal, noise-based, adversarial with label attacks, adversarial with uncertainty attacks). Thus, either ID-verification or OOD-verification perform well, depending on the chosen threshold.

In contrast to that, adversarial training improves robustness w.r.t. the predicted class label for most pair model/data set (Fig. 7, 32).

Table 28: Randomized smoothing verification of CIFAR10 (ID data) and SVHN (OOD data) harmonic mean.

|                                       | 0.1         | 0.2         | 0.5         |
|---------------------------------------|-------------|-------------|-------------|
| <b>adv. train. loss: None</b>         |             |             |             |
| PriorNet                              | 26.7        | 3.7         | 0.0         |
| PostNet                               | 35.9        | 34.1        | 0.0         |
| DDNet                                 | 45.2        | 18.1        | <b>46.6</b> |
| EvNet                                 | <b>47.6</b> | <b>45.4</b> | 22.6        |
| <b>adv. train. loss: crossentropy</b> |             |             |             |
| PriorNet                              | 0.2         | 0.0         | <b>41.4</b> |
| PostNet                               | 34.4        | <b>47.9</b> | 0.0         |
| DDNet                                 | <b>49.2</b> | 44.3        | 0.0         |
| EvNet                                 | 41.1        | 22.4        | 4.7         |
| <b>adv. train. loss: diffe</b>        |             |             |             |
| PriorNet                              | 2.2         | 0.0         | 0.0         |
| PostNet                               | 41.9        | 11.4        | 0.0         |
| DDNet                                 | 46.2        | 8.4         | 0.0         |
| EvNet                                 | <b>47.3</b> | <b>34.6</b> | <b>2.0</b>  |

Table 29: Randomized smoothing verification of MNIST (ID data) and KMNIST (OOD data): percentage of samples that is certifiably correct (cc) and mean certified radius (R).

| $\sigma$                              | ID-Verification |             |             |             |             |             | OOD-Verification |             |              |             |              |             |
|---------------------------------------|-----------------|-------------|-------------|-------------|-------------|-------------|------------------|-------------|--------------|-------------|--------------|-------------|
|                                       | 0.1             |             | 0.2         |             | 0.5         |             | 0.1              |             | 0.2          |             | 0.5          |             |
|                                       | cc              | R           | cc          | R           | cc          | R           | cc               | R           | cc           | R           | cc           | R           |
| <b>adv. train. loss: None</b>         |                 |             |             |             |             |             |                  |             |              |             |              |             |
| PriorNet                              | <b>97.0</b>     | <b>0.36</b> | <b>88.2</b> | <b>0.52</b> | 3.0         | 0.20        | <b>98.7</b>      | <b>0.37</b> | <b>99.5</b>  | <b>0.74</b> | 100.0        | 1.88        |
| PostNet                               | 93.2            | 0.32        | 68.4        | 0.31        | 0.8         | 0.11        | 98.4             | 0.36        | 99.5         | 0.68        | 100.0        | 1.55        |
| DDNet                                 | 90.6            | 0.35        | 52.3        | 0.46        | 0.0         | 0.00        | 97.8             | 0.37        | <b>99.5</b>  | <b>0.74</b> | <b>100.0</b> | <b>1.90</b> |
| EvNet                                 | 95.0            | 0.31        | 83.0        | 0.30        | <b>17.3</b> | <b>0.21</b> | 77.3             | 0.17        | 82.7         | 0.24        | 88.6         | 0.39        |
| <b>adv. train. loss: crossentropy</b> |                 |             |             |             |             |             |                  |             |              |             |              |             |
| PriorNet                              | <b>97.0</b>     | <b>0.36</b> | <b>94.3</b> | <b>0.58</b> | 1.0         | 0.15        | <b>99.8</b>      | <b>0.38</b> | 99.5         | 0.74        | 100.0        | 1.89        |
| PostNet                               | 94.4            | 0.31        | 57.7        | 0.32        | 3.2         | 0.13        | 97.2             | 0.33        | 95.6         | 0.51        | 99.6         | 1.02        |
| DDNet                                 | 82.6            | 0.34        | 55.5        | 0.46        | 0.0         | 0.00        | 99.6             | 0.38        | <b>100.0</b> | <b>0.75</b> | <b>100.0</b> | <b>1.90</b> |
| EvNet                                 | 96.8            | 0.34        | 70.1        | 0.27        | <b>18.8</b> | <b>0.25</b> | 58.7             | 0.11        | 85.2         | 0.24        | 89.1         | 0.26        |
| <b>adv. train. loss: diffe</b>        |                 |             |             |             |             |             |                  |             |              |             |              |             |
| PriorNet                              | <b>98.0</b>     | <b>0.37</b> | <b>83.4</b> | <b>0.49</b> | 0.7         | 0.10        | <b>99.7</b>      | <b>0.38</b> | <b>100.0</b> | <b>0.76</b> | <b>100.0</b> | <b>1.90</b> |
| PostNet                               | 93.5            | 0.33        | 47.1        | 0.23        | 0.6         | 0.15        | 95.8             | 0.34        | 98.8         | 0.63        | 100.0        | 1.38        |
| DDNet                                 | 93.6            | 0.36        | 52.7        | 0.43        | 0.0         | 0.00        | 97.7             | 0.37        | 99.7         | 0.75        | <b>100.0</b> | <b>1.90</b> |
| EvNet                                 | 95.4            | 0.33        | 81.6        | 0.34        | <b>23.1</b> | <b>0.63</b> | 81.7             | 0.20        | 82.8         | 0.28        | 99.1         | 1.70        |

Table 30: Randomized smoothing verification of MNIST (ID data) and KMNIST (OOD data): percentage of samples that is certifiably wrong (cw) and mean certified radius (R).

|                                       | 0.1        |             | 0.2         |             | 0.5         |             |
|---------------------------------------|------------|-------------|-------------|-------------|-------------|-------------|
|                                       | cw         | R           | cw          | R           | cw          | R           |
| <b>adv. train. loss: None</b>         |            |             |             |             |             |             |
| PriorNet                              | <b>2.8</b> | <b>0.16</b> | <b>10.7</b> | <b>0.21</b> | 96.0        | 0.97        |
| PostNet                               | 6.4        | 0.17        | 28.8        | 0.22        | 99.0        | 1.15        |
| DDNet                                 | 9.1        | 0.24        | 46.3        | 0.42        | 100.0       | 1.81        |
| EvNet                                 | 4.5        | 0.10        | 15.1        | 0.13        | <b>78.8</b> | <b>0.31</b> |
| <b>adv. train. loss: crossentropy</b> |            |             |             |             |             |             |
| PriorNet                              | <b>2.9</b> | <b>0.20</b> | <b>4.9</b>  | <b>0.24</b> | 98.4        | 1.05        |
| PostNet                               | 5.3        | 0.17        | 38.8        | 0.23        | 95.2        | 0.93        |
| DDNet                                 | 16.4       | 0.25        | 43.5        | 0.41        | 100.0       | 1.74        |
| EvNet                                 | 3.0        | 0.08        | 26.3        | 0.13        | <b>76.3</b> | <b>0.27</b> |
| <b>adv. train. loss: diffe</b>        |            |             |             |             |             |             |
| PriorNet                              | <b>2.0</b> | <b>0.19</b> | <b>15.7</b> | <b>0.25</b> | 98.8        | 1.10        |
| PostNet                               | 6.3        | 0.17        | 49.8        | 0.25        | 99.1        | 1.10        |
| DDNet                                 | 6.2        | 0.22        | 46.2        | 0.42        | 100.0       | 1.81        |
| EvNet                                 | 4.2        | 0.14        | 17.0        | 0.16        | <b>73.9</b> | <b>0.94</b> |

Table 31: Randomized smoothing verification of MNIST (ID data) and KMNIST (OOD data) harmonic mean.

|                                       | 0.1         | 0.2         | 0.5         |
|---------------------------------------|-------------|-------------|-------------|
| <b>adv. train. loss: None</b>         |             |             |             |
| PriorNet                              | 5.5         | 19.1        | 5.9         |
| PostNet                               | 12.0        | 40.5        | 1.5         |
| DDNet                                 | <b>16.5</b> | <b>49.2</b> | 0.0         |
| EvNet                                 | 8.7         | 25.6        | <b>28.4</b> |
| <b>adv. train. loss: crossentropy</b> |             |             |             |
| PriorNet                              | 5.6         | 9.3         | 2.0         |
| PostNet                               | 10.0        | 46.4        | 6.2         |
| DDNet                                 | <b>27.4</b> | <b>48.8</b> | 0.0         |
| EvNet                                 | 5.8         | 38.2        | <b>30.2</b> |
| <b>adv. train. loss: diffe</b>        |             |             |             |
| PriorNet                              | 3.9         | 26.4        | 1.4         |
| PostNet                               | <b>11.8</b> | 48.4        | 1.2         |
| DDNet                                 | 11.6        | <b>49.2</b> | 0.0         |
| EvNet                                 | 8.0         | 28.1        | <b>35.2</b> |

Table 32: Adversarial training with CE: Accuracy under PGD label attacks (AUC-PR).

| Att. Rad.         | 0.1         | 0.2         | 0.5         | 1.0         | 2.0         | 4.0         |  | 0.1            | 0.2         | 0.5         | 1.0         | 2.0         | 4.0         |
|-------------------|-------------|-------------|-------------|-------------|-------------|-------------|--|----------------|-------------|-------------|-------------|-------------|-------------|
| <b>MNIST</b>      |             |             |             |             |             |             |  | <b>CIFAR10</b> |             |             |             |             |             |
| PostNet           | <b>99.1</b> | 98.7        | 96.7        | 89.3        | 62.4        | 14.8        |  | 72.1           | 50.6        | 12.8        | 2.4         | 0.2         | 0.1         |
| PriorNet          | <b>99.1</b> | 98.8        | <b>97.6</b> | <b>94.8</b> | <b>91.1</b> | <b>79.5</b> |  | 69.6           | <b>63.9</b> | <b>55.8</b> | <b>46.4</b> | <b>30.9</b> | <b>11.1</b> |
| DDNet             | <b>99.1</b> | <b>98.9</b> | 97.4        | 90.6        | 47.0        | 0.2         |  | 74.7           | <b>63.9</b> | 23.6        | 2.0         | 0.0         | 0.0         |
| EvNet             | 80.3        | 98.3        | 96.7        | 90.5        | 60.0        | 52.7        |  | <b>78.3</b>    | 51.0        | 14.6        | 2.6         | 2.9         | 0.7         |
| <b>Sensorless</b> |             |             |             |             |             |             |  | <b>Segment</b> |             |             |             |             |             |
| PostNet           | 15.5        | 6.4         | 4.7         | <b>6.7</b>  | <b>11.1</b> | <b>11.7</b> |  | 84.5           | 52.4        | <b>21.1</b> | <b>7.6</b>  | <b>5.0</b>  | <b>6.3</b>  |
| PriorNet          | 31.3        | 15.8        | 0.2         | 0.0         | 0.3         | 5.3         |  | <b>94.0</b>    | <b>65.2</b> | 19.1        | 0.6         | 0.0         | 0.0         |
| DDNet             | 12.4        | 4.2         | 0.2         | 0.3         | 0.2         | 0.1         |  | 91.4           | 46.2        | 7.4         | 0.2         | 0.0         | 0.0         |
| EvNet             | <b>33.6</b> | <b>19.4</b> | <b>8.3</b>  | 5.4         | 2.6         | 1.7         |  | 93.0           | 55.2        | 15.5        | 2.0         | 1.4         | 1.4         |

Table 33: Adversarial training with CE: Accuracy under FGSM label attacks (AUC-PR).

| Att. Rad.         | 0.1         | 0.2         | 0.5         | 1.0         | 2.0         | 4.0         |  | 0.1            | 0.2         | 0.5         | 1.0         | 2.0         | 4.0         |
|-------------------|-------------|-------------|-------------|-------------|-------------|-------------|--|----------------|-------------|-------------|-------------|-------------|-------------|
| <b>MNIST</b>      |             |             |             |             |             |             |  | <b>CIFAR10</b> |             |             |             |             |             |
| PostNet           | <b>99.1</b> | 98.8        | 97.6        | 95.3        | 90.1        | 81.3        |  | 71.0           | 54.4        | 30.4        | 19.9        | 17.0        | 17.7        |
| PriorNet          | <b>99.1</b> | <b>98.9</b> | <b>97.9</b> | <b>96.2</b> | <b>94.7</b> | <b>90.0</b> |  | 69.7           | <b>65.3</b> | <b>58.8</b> | <b>52.1</b> | <b>38.9</b> | <b>22.2</b> |
| DDNet             | <b>99.1</b> | <b>98.9</b> | 97.8        | 94.6        | 79.1        | 27.9        |  | <b>73.7</b>    | 64.7        | 34.8        | 15.5        | 8.0         | 4.8         |
| EvNet             | 80.3        | 98.5        | 97.6        | 94.0        | 72.7        | 81.3        |  | 48.0           | 56.9        | 27.0        | 17.1        | 17.8        | 15.7        |
| <b>Sensorless</b> |             |             |             |             |             |             |  | <b>Segment</b> |             |             |             |             |             |
| PostNet           | 20.6        | 10.6        | 11.0        | 11.8        | 12.5        | 12.5        |  | 82.9           | 60.1        | <b>27.5</b> | <b>22.7</b> | <b>19.1</b> | <b>24.3</b> |
| PriorNet          | 35.0        | 20.8        | 0.5         | 0.1         | 0.9         | 7.5         |  | 91.2           | 55.2        | 19.0        | 0.7         | 0.0         | 0.0         |
| DDNet             | 16.4        | 9.7         | 7.0         | 4.6         | 6.4         | 7.5         |  | 86.8           | 36.4        | 10.5        | 0.8         | 0.0         | 0.0         |
| EvNet             | <b>41.1</b> | <b>27.4</b> | <b>20.1</b> | <b>15.2</b> | <b>14.9</b> | <b>12.6</b> |  | <b>93.8</b>    | <b>64.2</b> | 25.0        | 1.5         | 0.0         | 0.4         |

Table 34: Adversarial training with CE: Accuracy under Noise label attacks (AUC-PR).

| Att. Rad.  | 0.1         | 0.2         | 0.5         | 1.0         | 2.0         | 4.0         |         | 0.1         | 0.2         | 0.5        | 1.0         | 2.0         | 4.0         |
|------------|-------------|-------------|-------------|-------------|-------------|-------------|---------|-------------|-------------|------------|-------------|-------------|-------------|
| MNIST      |             |             |             |             |             |             | CIFAR10 |             |             |            |             |             |             |
| PostNet    | <b>97.8</b> | 84.3        | 8.4         | <b>3.2</b>  | 0.0         | 0.0         |         | 19.3        | 7.3         | 3.4        | 0.0         | <b>10.2</b> | <b>10.1</b> |
| PriorNet   | 97.7        | <b>94.6</b> | <b>32.7</b> | 0.0         | 0.0         | 0.0         |         | <b>39.1</b> | <b>16.8</b> | <b>3.8</b> | <b>10.5</b> | 3.7         | 0.4         |
| DDNet      | 97.6        | 89.1        | 16.5        | 2.1         | 0.0         | <b>0.3</b>  |         | 25.8        | 15.1        | 2.2        | 0.2         | 9.8         | 8.9         |
| EvNet      | 94.1        | 74.3        | 5.0         | 0.0         | 0.0         | 0.0         |         | 27.1        | 7.1         | 0.1        | 2.8         | 8.6         | 9.7         |
| Sensorless |             |             |             |             |             |             | Segment |             |             |            |             |             |             |
| PostNet    | 1.0         | <b>4.7</b>  | <b>11.4</b> | <b>11.7</b> | <b>11.7</b> | <b>11.7</b> |         | 27.6        | 1.5         | <b>3.6</b> | <b>15.2</b> | <b>20.9</b> | <b>21.2</b> |
| PriorNet   | <b>4.7</b>  | 0.0         | 0.0         | 0.1         | 0.0         | 2.2         |         | <b>56.4</b> | <b>16.1</b> | 2.1        | 0.9         | 0.0         | 0.0         |
| DDNet      | 0.3         | 0.0         | 0.0         | 0.0         | 0.0         | 0.1         |         | 49.4        | 6.1         | 0.0        | 0.0         | 0.0         | 0.0         |
| EvNet      | 0.9         | 0.0         | 0.9         | 0.2         | 3.5         | 3.1         |         | 51.2        | 10.6        | 0.3        | 0.0         | 0.0         | 0.6         |

Table 35: Randomized smoothing verification of CIFAR10: percentage of samples that is certifiably correct (cc) w.r.t. the predicted class label and mean certified radius (R) w.r.t. class labels.

|                                | 0.1         |             | 0.2         |             | 0.5         |             |
|--------------------------------|-------------|-------------|-------------|-------------|-------------|-------------|
|                                | cc          | R           | cc          | R           | cc          | R           |
| adv. train. loss: None         |             |             |             |             |             |             |
| PriorNet                       | <b>42.8</b> | <b>0.25</b> | <b>21.2</b> | <b>0.42</b> | <b>11.8</b> | <b>1.30</b> |
| PostNet                        | 35.0        | 0.22        | 12.3        | 0.51        | 9.4         | 0.12        |
| DDNet                          | 31.7        | 0.26        | 12.2        | 0.69        | 10.8        | 1.91        |
| EvNet                          | 34.3        | 0.22        | 15.4        | 0.42        | 11.0        | 0.63        |
| adv. train. loss: crossentropy |             |             |             |             |             |             |
| PriorNet                       | <b>56.2</b> | <b>0.25</b> | <b>25.4</b> | <b>0.48</b> | <b>13.0</b> | <b>0.35</b> |
| PostNet                        | 34.7        | 0.22        | 15.6        | 0.45        | 11.0        | 0.32        |
| DDNet                          | 41.7        | 0.24        | 19.6        | 0.44        | 9.1         | 1.30        |
| EvNet                          | 34.3        | 0.16        | 11.1        | 0.55        | 10.8        | 0.74        |
| adv. train. loss: diffe        |             |             |             |             |             |             |
| PriorNet                       | 48.1        | 0.23        | <b>28.0</b> | <b>0.40</b> | 8.4         | 0.22        |
| PostNet                        | 45.5        | 0.21        | 18.0        | 0.36        | 5.4         | 0.18        |
| DDNet                          | <b>49.2</b> | <b>0.25</b> | 26.3        | 0.34        | 9.6         | 0.27        |
| EvNet                          | 21.9        | 0.30        | 15.2        | 0.24        | <b>10.8</b> | <b>1.06</b> |

Table 36: Randomized smoothing verification of MNIST: percentage of samples that is certifiably correct (cc) w.r.t. the predicted class label and mean certified radius (R) w.r.t. class labels.

|                                | 0.1         |             | 0.2         |             | 0.5         |             |
|--------------------------------|-------------|-------------|-------------|-------------|-------------|-------------|
|                                | cc          | R           | cc          | R           | cc          | R           |
| adv. train. loss: None         |             |             |             |             |             |             |
| PriorNet                       | 99.2        | 0.38        | <b>98.8</b> | <b>0.71</b> | <b>61.4</b> | <b>0.45</b> |
| PostNet                        | 99.2        | 0.38        | 98.1        | 0.66        | 51.2        | 0.51        |
| DDNet                          | <b>99.3</b> | <b>0.38</b> | 98.0        | 0.68        | 47.3        | 0.52        |
| EvNet                          | 98.9        | 0.37        | 96.2        | 0.56        | 57.1        | 0.42        |
| adv. train. loss: crossentropy |             |             |             |             |             |             |
| PriorNet                       | 99.1        | 0.38        | <b>99.0</b> | <b>0.72</b> | 50.4        | 0.53        |
| PostNet                        | <b>99.4</b> | <b>0.38</b> | 97.4        | 0.62        | 28.8        | 0.51        |
| DDNet                          | 99.3        | 0.38        | 98.6        | 0.69        | <b>75.4</b> | <b>0.64</b> |
| EvNet                          | 99.1        | 0.37        | 92.1        | 0.43        | 35.0        | 0.40        |
| adv. train. loss: diffe        |             |             |             |             |             |             |
| PriorNet                       | 99.5        | 0.38        | <b>98.3</b> | <b>0.71</b> | 64.0        | 0.48        |
| PostNet                        | 99.1        | 0.38        | 96.8        | 0.62        | 48.1        | 0.44        |
| DDNet                          | <b>99.6</b> | <b>0.38</b> | 98.1        | 0.69        | 32.4        | 0.64        |
| EvNet                          | 99.1        | 0.37        | 96.7        | 0.59        | <b>89.5</b> | <b>0.93</b> |

Table 37: Adversarial training with CE: Certainty based on differential entropy under PGD label attacks (AUC-PR).

| Att. Rad.  | 0.1          | 0.2         | 0.5         | 1.0         | 2.0         | 4.0         |         | 0.1         | 0.2         | 0.5         | 1.0         | 2.0         | 4.0        |
|------------|--------------|-------------|-------------|-------------|-------------|-------------|---------|-------------|-------------|-------------|-------------|-------------|------------|
| MNIST      |              |             |             |             |             |             | CIFAR10 |             |             |             |             |             |            |
| PostNet    | 99.9         | 99.8        | 98.5        | 88.7        | 47.6        | 9.0         |         | 88.1        | 54.1        | 7.5         | 1.3         | 0.1         | 0.1        |
| PriorNet   | 99.8         | 99.4        | 97.7        | 92.4        | <b>79.7</b> | <b>67.5</b> |         | 54.0        | 45.5        | <b>37.9</b> | <b>29.7</b> | <b>18.1</b> | <b>6.1</b> |
| DDNet      | <b>100.0</b> | <b>99.9</b> | <b>99.7</b> | <b>96.9</b> | 46.1        | 0.1         |         | <b>92.1</b> | <b>83.1</b> | 24.8        | 1.1         | 0.0         | 0.0        |
| EvNet      | 81.2         | 98.4        | 95.5        | 90.4        | 53.2        | 38.3        |         | 62.9        | 59.2        | 13.1        | 1.5         | 1.6         | 0.4        |
| Sensorless |              |             |             |             |             |             | Segment |             |             |             |             |             |            |
| PostNet    | 8.8          | 4.2         | <b>4.6</b>  | <b>6.7</b>  | <b>11.1</b> | <b>11.7</b> |         | 76.1        | 35.8        | 12.6        | <b>4.9</b>  | <b>4.9</b>  | <b>6.3</b> |
| PriorNet   | <b>22.6</b>  | <b>11.7</b> | 0.2         | 0.0         | 0.3         | 3.6         |         | <b>98.1</b> | <b>66.2</b> | <b>12.8</b> | 0.6         | 0.0         | 0.0        |
| DDNet      | 10.9         | 3.0         | 0.1         | 0.2         | 0.1         | 0.1         |         | 95.9        | 52.6        | 4.5         | 0.5         | 0.0         | 0.0        |
| EvNet      | 21.4         | 11.0        | 4.4         | 3.1         | 1.7         | 1.4         |         | 94.8        | 42.7        | 8.9         | 1.2         | 1.3         | 1.3        |

Table 38: Adversarial training with CE: Certainty based on differential entropy under FGSM label attacks (AUC-PR).

| Att. Rad.  | 0.1         | 0.2         | 0.5         | 1.0         | 2.0         | 4.0         |         | 0.1         | 0.2         | 0.5         | 1.0         | 2.0         | 4.0         |
|------------|-------------|-------------|-------------|-------------|-------------|-------------|---------|-------------|-------------|-------------|-------------|-------------|-------------|
| MNIST      |             |             |             |             |             |             | CIFAR10 |             |             |             |             |             |             |
| PostNet    | 99.9        | 99.8        | 99.5        | 97.4        | <b>90.7</b> | <b>83.5</b> |         | 88.0        | 66.6        | 28.8        | 18.0        | 15.5        | <b>20.4</b> |
| PriorNet   | <b>99.8</b> | <b>99.5</b> | <b>98.2</b> | 94.6        | 89.3        | <b>83.5</b> |         | 54.7        | 48.1        | 42.3        | <b>36.8</b> | <b>27.3</b> | 19.8        |
| DDNet      | 100.0       | 99.9        | 99.7        | <b>98.7</b> | 87.3        | 27.4        |         | <b>91.3</b> | <b>83.4</b> | <b>45.4</b> | 15.0        | 6.5         | 3.6         |
| EvNet      | 81.2        | 98.7        | 97.4        | 95.9        | 73.4        | 80.7        |         | 62.4        | 68.7        | 28.6        | 15.1        | 20.5        | 23.1        |
| Sensorless |             |             |             |             |             |             | Segment |             |             |             |             |             |             |
| PostNet    | 12.5        | 7.5         | 9.9         | 11.6        | 12.5        | 12.5        |         | 75.1        | 46.2        | <b>20.5</b> | <b>19.5</b> | <b>20.2</b> | <b>26.3</b> |
| PriorNet   | 30.0        | 22.2        | 0.7         | 0.5         | 3.2         | 8.7         |         | <b>96.1</b> | <b>55.6</b> | 13.5        | 2.1         | 0.0         | 0.0         |
| DDNet      | 17.5        | 6.7         | 6.2         | 3.1         | 4.8         | 5.5         |         | 92.0        | 42.0        | 6.4         | 2.3         | 0.0         | 0.0         |
| EvNet      | <b>41.6</b> | <b>25.1</b> | <b>18.9</b> | <b>13.2</b> | <b>14.6</b> | <b>13.9</b> |         | 93.1        | 55.1        | 15.5        | 1.6         | 0.0         | 1.3         |

Table 39: Adversarial training with CE: Certainty based on differential entropy under Noise label attacks (AUC-PR).

| Att. Rad.  | 0.1          | 0.2         | 0.5         | 1.0         | 2.0         | 4.0         |         | 0.1         | 0.2         | 0.5        | 1.0         | 2.0         | 4.0         |
|------------|--------------|-------------|-------------|-------------|-------------|-------------|---------|-------------|-------------|------------|-------------|-------------|-------------|
| MNIST      |              |             |             |             |             |             | CIFAR10 |             |             |            |             |             |             |
| PostNet    | <b>100.0</b> | 98.8        | 54.7        | 12.1        | 0.0         | 0.0         |         | 52.1        | 22.7        | 6.6        | 0.0         | 9.8         | 9.0         |
| PriorNet   | <b>100.0</b> | <b>99.9</b> | <b>88.5</b> | 0.0         | 0.0         | 0.0         |         | 34.9        | 11.2        | <b>7.8</b> | <b>8.7</b>  | <b>10.0</b> | 0.4         |
| DDNet      | 99.8         | 98.5        | 77.2        | <b>15.1</b> | 0.0         | <b>0.4</b>  |         | <b>81.6</b> | <b>45.3</b> | 4.2        | 0.2         | 9.6         | 8.6         |
| EvNet      | 98.4         | 86.9        | 13.3        | 0.0         | 0.0         | 0.0         |         | 54.5        | 17.6        | 0.1        | 3.7         | 8.3         | <b>10.5</b> |
| Sensorless |              |             |             |             |             |             | Segment |             |             |            |             |             |             |
| PostNet    | 0.6          | <b>5.1</b>  | <b>12.2</b> | <b>11.7</b> | <b>11.7</b> | <b>11.7</b> |         | 36.7        | 2.0         | 3.6        | <b>17.2</b> | <b>20.8</b> | <b>21.3</b> |
| PriorNet   | <b>8.5</b>   | 0.0         | 0.0         | 0.2         | 0.0         | 2.0         |         | <b>90.5</b> | <b>32.8</b> | <b>7.1</b> | 1.2         | 0.0         | 0.0         |
| DDNet      | 1.5          | 0.0         | 0.0         | 0.0         | 0.0         | 0.0         |         | 79.6        | 21.8        | 0.0        | 0.0         | 0.0         | 0.0         |
| EvNet      | 1.5          | 0.0         | 1.0         | 0.2         | 4.9         | 4.8         |         | 75.7        | 22.0        | 3.2        | 0.0         | 0.0         | 0.7         |

Table 40: Adversarial training with CE: Attack-Detection based on differential entropy under PGD label attacks (AUC-PR).

| Att. Rad.  | 0.1         | 0.2         | 0.5         | 1.0         | 2.0         | 4.0         |         | 0.1         | 0.2         | 0.5         | 1.0         | 2.0         | 4.0         |
|------------|-------------|-------------|-------------|-------------|-------------|-------------|---------|-------------|-------------|-------------|-------------|-------------|-------------|
| MNIST      |             |             |             |             |             |             | CIFAR10 |             |             |             |             |             |             |
| PostNet    | 57.8        | 67.0        | 84.1        | 91.0        | 76.8        | 47.9        |         | <b>62.5</b> | <b>66.7</b> | 41.6        | 35.0        | 37.5        | 36.6        |
| PriorNet   | <b>71.7</b> | <b>83.8</b> | <b>96.5</b> | <b>96.0</b> | 90.0        | 79.3        |         | 54.4        | 55.2        | 54.8        | <b>51.1</b> | <b>45.9</b> | 40.6        |
| DDNet      | 54.4        | 57.4        | 69.9        | 86.4        | <b>96.2</b> | <b>86.3</b> |         | 56.7        | 62.4        | <b>60.8</b> | 39.3        | 32.9        | 31.8        |
| EvNet      | 52.9        | 59.7        | 67.7        | 71.9        | 66.5        | 58.5        |         | 52.4        | 59.0        | 48.9        | 41.7        | 40.5        | <b>40.7</b> |
| Sensorless |             |             |             |             |             |             | Segment |             |             |             |             |             |             |
| PostNet    | 43.7        | 41.1        | <b>38.4</b> | <b>53.0</b> | <b>83.5</b> | <b>98.7</b> |         | 94.2        | 73.5        | 47.7        | 42.7        | <b>56.8</b> | <b>70.7</b> |
| PriorNet   | <b>60.9</b> | <b>47.5</b> | 35.8        | 31.1        | 30.8        | 34.5        |         | 86.2        | <b>90.1</b> | <b>59.5</b> | <b>47.6</b> | 34.0        | 30.8        |
| DDNet      | 53.1        | 43.3        | 34.7        | 33.0        | 31.1        | 32.6        |         | 76.6        | 83.0        | 45.7        | 32.7        | 30.8        | 30.8        |
| EvNet      | 48.3        | 42.1        | 37.7        | 36.6        | 39.2        | 48.5        |         | <b>95.9</b> | 79.6        | 43.3        | 33.4        | 31.3        | 31.2        |

Table 41: Adversarial training with CE: Attack-Detection based on differential entropy under FGSM label attacks (AUC-PR).

| Att. Rad.  | 0.1         | 0.2         | 0.5         | 1.0          | 2.0         | 4.0          |         | 0.1         | 0.2         | 0.5         | 1.0          | 2.0         | 4.0          |
|------------|-------------|-------------|-------------|--------------|-------------|--------------|---------|-------------|-------------|-------------|--------------|-------------|--------------|
| MNIST      |             |             |             |              |             |              | CIFAR10 |             |             |             |              |             |              |
| PostNet    | 56.1        | 62.8        | 75.5        | 86.3         | 90.4        | 92.6         |         | <b>63.0</b> | <b>68.9</b> | <b>66.1</b> | 63.2         | 66.2        | <b>77.5</b>  |
| PriorNet   | <b>68.6</b> | <b>80.6</b> | <b>96.8</b> | <b>98.0</b>  | <b>98.4</b> | 98.2         |         | 55.9        | 59.0        | 63.0        | 65.4         | 63.4        | 58.4         |
| DDNet      | 54.4        | 57.4        | 69.5        | 84.0         | 95.5        | <b>99.0</b>  |         | 57.6        | 63.7        | 70.3        | <b>69.0</b>  | <b>73.4</b> | 76.4         |
| EvNet      | 52.6        | 57.9        | 62.9        | 66.0         | 64.0        | 70.0         |         | 52.4        | 60.0        | 59.0        | 61.2         | 62.9        | 72.3         |
| Sensorless |             |             |             |              |             |              | Segment |             |             |             |              |             |              |
| PostNet    | <b>98.3</b> | <b>99.8</b> | <b>99.9</b> | <b>100.0</b> | <b>99.9</b> | <b>100.0</b> |         | <b>98.0</b> | <b>99.8</b> | <b>99.9</b> | <b>100.0</b> | <b>99.9</b> | <b>100.0</b> |
| PriorNet   | 78.6        | 68.1        | 37.6        | 32.0         | 30.7        | 49.1         |         | 68.8        | 60.0        | 42.9        | 31.4         | 30.7        | 32.3         |
| DDNet      | 60.9        | 55.5        | 41.0        | 34.6         | 31.7        | 32.7         |         | 61.3        | 51.7        | 39.0        | 33.8         | 31.5        | 32.5         |
| EvNet      | 70.0        | 70.4        | 67.5        | 63.0         | 77.2        | 76.6         |         | 69.5        | 70.0        | 66.9        | 62.4         | 77.2        | 76.4         |

Table 42: Adversarial training with CE: Attack-Detection based on differential entropy under Noise label attacks (AUC-PR).

| Att. Rad.  | 0.1         | 0.2          | 0.5          | 1.0          | 2.0          | 4.0          |         | 0.1         | 0.2         | 0.5         | 1.0          | 2.0          | 4.0          |
|------------|-------------|--------------|--------------|--------------|--------------|--------------|---------|-------------|-------------|-------------|--------------|--------------|--------------|
| MNIST      |             |              |              |              |              |              | CIFAR10 |             |             |             |              |              |              |
| PostNet    | <b>59.0</b> | 66.4         | 97.2         | 95.7         | 95.9         | 99.6         |         | <b>80.5</b> | <b>89.2</b> | 95.2        | <b>99.5</b>  | 85.7         | 99.7         |
| PriorNet   | 31.8        | 33.8         | 61.3         | 99.5         | <b>100.0</b> | 95.8         |         | 52.2        | 50.2        | 31.2        | 54.4         | <b>99.8</b>  | <b>100.0</b> |
| DDNet      | 51.8        | <b>86.4</b>  | <b>99.8</b>  | <b>100.0</b> | <b>100.0</b> | 99.6         |         | 80.3        | 88.4        | <b>99.7</b> | 98.8         | 99.4         | 68.4         |
| EvNet      | 51.7        | 58.6         | 85.3         | 84.9         | 66.3         | <b>100.0</b> |         | 46.9        | 68.1        | 93.4        | 94.9         | 71.4         | 77.8         |
| Sensorless |             |              |              |              |              |              | Segment |             |             |             |              |              |              |
| PostNet    | <b>99.9</b> | <b>100.0</b> | <b>100.0</b> | <b>100.0</b> | <b>99.9</b>  | <b>100.0</b> |         | <b>93.2</b> | <b>99.3</b> | <b>99.9</b> | <b>100.0</b> | <b>100.0</b> | <b>100.0</b> |
| PriorNet   | 56.7        | 42.9         | 32.0         | 30.8         | 31.0         | 30.7         |         | 68.8        | 60.0        | 42.9        | 31.4         | 30.7         | 32.3         |
| DDNet      | 51.2        | 43.9         | 33.8         | 32.4         | 31.7         | 35.0         |         | 61.3        | 51.7        | 39.0        | 33.8         | 31.5         | 32.5         |
| EvNet      | 69.2        | 58.6         | 71.7         | 52.3         | 70.9         | 77.6         |         | 69.5        | 70.0        | 66.9        | 62.4         | 77.2         | 76.4         |

Table 43: Adversarial training with CE: OOD detection based on differential entropy under PGD uncertainty attacks against differential entropy on ID data and OOD data (AUC-PR).

| Att. Rad.                         | ID-Attack (non-attacked OOD) |             |             |             |             |             | OOD-Attack (non-attacked ID) |             |             |             |             |             |
|-----------------------------------|------------------------------|-------------|-------------|-------------|-------------|-------------|------------------------------|-------------|-------------|-------------|-------------|-------------|
|                                   | 0.1                          | 0.2         | 0.5         | 1.0         | 2.0         | 4.0         | 0.1                          | 0.2         | 0.5         | 1.0         | 2.0         | 4.0         |
| <b>MNIST – KMNIST</b>             |                              |             |             |             |             |             |                              |             |             |             |             |             |
| PostNet                           | 95.7                         | 93.1        | 88.3        | 78.1        | 46.9        | 32.1        | 94.8                         | 90.3        | 78.6        | 58.7        | 46.4        | 41.2        |
| PriorNet                          | <b>99.6</b>                  | <b>99.3</b> | <b>98.1</b> | <b>95.4</b> | <b>86.7</b> | <b>62.6</b> | <b>99.7</b>                  | <b>99.3</b> | 98.3        | 90.7        | 77.7        | 37.3        |
| DDNet                             | 99.0                         | 98.9        | 97.8        | 91.7        | 58.6        | 30.7        | 99.1                         | 99.0        | <b>98.4</b> | <b>96.2</b> | <b>90.8</b> | <b>75.7</b> |
| EvNet                             | 71.3                         | 66.9        | 60.6        | 64.4        | 50.4        | 42.7        | 66.3                         | 47.8        | 37.4        | 46.7        | 37.3        | 33.3        |
| <b>CIFAR10 – SVHN</b>             |                              |             |             |             |             |             |                              |             |             |             |             |             |
| PostNet                           | 65.1                         | 45.6        | 21.0        | <b>17.7</b> | <b>16.4</b> | 15.5        | 63.8                         | 41.1        | 19.6        | 19.4        | 17.0        | 16.1        |
| PriorNet                          | 17.0                         | 16.6        | 16.0        | 15.9        | 16.0        | <b>16.1</b> | 17.1                         | 16.4        | 15.8        | 15.8        | 15.6        | 15.7        |
| DDNet                             | <b>70.8</b>                  | <b>63.5</b> | <b>34.0</b> | 16.8        | 15.5        | 15.4        | <b>72.7</b>                  | <b>64.8</b> | 28.3        | 17.9        | 15.4        | 15.4        |
| EvNet                             | 53.9                         | 43.7        | 24.2        | 16.6        | 16.1        | 15.5        | 55.8                         | 34.7        | <b>29.6</b> | <b>21.5</b> | <b>22.0</b> | <b>22.5</b> |
| <b>Sens. – Sens. class 10, 11</b> |                              |             |             |             |             |             |                              |             |             |             |             |             |
| PostNet                           | <b>40.5</b>                  | <b>37.3</b> | <b>43.8</b> | <b>46.7</b> | <b>47.3</b> | <b>45.8</b> | <b>42.6</b>                  | <b>41.7</b> | <b>31.7</b> | <b>38.5</b> | <b>81.9</b> | <b>99.3</b> |
| PriorNet                          | 26.6                         | 26.6        | 26.5        | 26.5        | 30.8        | 40.0        | 27.9                         | 27.7        | 26.5        | 26.5        | 26.5        | 26.5        |
| DDNet                             | 26.6                         | 26.6        | 26.5        | 26.5        | 26.6        | 28.2        | 26.6                         | 26.6        | 26.8        | 26.7        | 26.6        | 26.7        |
| EvNet                             | 31.8                         | 29.7        | 27.2        | 28.0        | 32.8        | 37.8        | 36.5                         | 38.1        | 27.8        | 27.4        | 30.0        | 38.3        |
| <b>Seg. – Seg. class sky</b>      |                              |             |             |             |             |             |                              |             |             |             |             |             |
| PostNet                           | 61.2                         | <b>50.8</b> | <b>53.3</b> | <b>32.7</b> | <b>45.3</b> | <b>49.2</b> | <b>79.9</b>                  | <b>61.6</b> | <b>62.7</b> | <b>32.6</b> | <b>46.0</b> | <b>66.7</b> |
| PriorNet                          | 31.1                         | 30.8        | 30.8        | 30.8        | 30.8        | 30.8        | 31.4                         | 30.8        | 30.8        | 30.8        | 30.8        | 30.8        |
| DDNet                             | 30.8                         | 30.8        | 30.8        | 30.8        | 30.8        | 30.8        | 30.8                         | 30.8        | 30.8        | 30.8        | 30.8        | 30.8        |
| EvNet                             | <b>67.0</b>                  | 34.9        | 30.9        | 30.8        | 30.8        | 31.6        | 75.5                         | 52.1        | 31.2        | 31.2        | 30.8        | 30.8        |

Table 44: Adversarial training with CE: OOD detection based on differential entropy under FGSM uncertainty attacks against differential entropy on ID data and OOD data (AUC-PR).

| Att. Rad.                         | ID-Attack (non-attacked OOD) |             |             |             |             |             | OOD-Attack (non-attacked ID) |             |             |              |             |              |
|-----------------------------------|------------------------------|-------------|-------------|-------------|-------------|-------------|------------------------------|-------------|-------------|--------------|-------------|--------------|
|                                   | 0.1                          | 0.2         | 0.5         | 1.0         | 2.0         | 4.0         | 0.1                          | 0.2         | 0.5         | 1.0          | 2.0         | 4.0          |
| <b>MNIST – KMNIST</b>             |                              |             |             |             |             |             |                              |             |             |              |             |              |
| PostNet                           | 95.8                         | 93.7        | 91.7        | 90.2        | 80.3        | 73.5        | 95.0                         | 91.6        | 84.9        | 80.8         | 73.9        | 81.4         |
| PriorNet                          | <b>99.5</b>                  | <b>99.2</b> | <b>98.3</b> | <b>95.7</b> | <b>87.2</b> | <b>77.0</b> | <b>99.5</b>                  | <b>99.2</b> | <b>98.8</b> | 96.8         | 92.4        | 76.2         |
| DDNet                             | 99.0                         | 99.0        | 98.1        | 94.6        | 80.3        | 47.3        | 99.1                         | 99.1        | 98.6        | <b>97.3</b>  | <b>95.3</b> | <b>92.4</b>  |
| EvNet                             | 71.4                         | 67.7        | 62.6        | 68.6        | 56.9        | 53.0        | 68.3                         | 57.1        | 50.7        | 62.6         | 50.7        | 46.4         |
| <b>CIFAR10 – SVHN</b>             |                              |             |             |             |             |             |                              |             |             |              |             |              |
| PostNet                           | 67.4                         | 61.4        | <b>62.9</b> | <b>70.7</b> | <b>65.0</b> | 44.4        | 65.6                         | 54.6        | 39.0        | <b>45.1</b>  | <b>62.7</b> | <b>77.6</b>  |
| PriorNet                          | 17.0                         | 16.9        | 17.1        | 18.1        | 24.0        | 37.5        | 17.2                         | 17.3        | 17.4        | 18.9         | 22.2        | 29.8         |
| DDNet                             | <b>71.0</b>                  | <b>66.9</b> | 56.1        | 55.7        | 48.7        | 44.7        | <b>72.2</b>                  | <b>66.4</b> | <b>48.0</b> | 42.2         | 48.7        | 69.1         |
| EvNet                             | 56.5                         | 62.2        | 51.6        | 53.9        | 64.4        | <b>46.6</b> | 55.9                         | 42.1        | 35.0        | 37.4         | 56.2        | 68.7         |
| <b>Sens. – Sens. class 10, 11</b> |                              |             |             |             |             |             |                              |             |             |              |             |              |
| PostNet                           | 41.2                         | 37.9        | 34.3        | 41.4        | 45.7        | 45.7        | <b>99.2</b>                  | <b>99.8</b> | <b>99.8</b> | <b>100.0</b> | <b>99.9</b> | <b>100.0</b> |
| PriorNet                          | 27.2                         | 28.0        | 29.3        | 37.5        | 96.5        | 77.7        | 28.8                         | 29.5        | 26.6        | 26.5         | 26.5        | 26.5         |
| DDNet                             | 30.7                         | 32.8        | <b>65.6</b> | <b>72.7</b> | <b>92.9</b> | <b>94.4</b> | 27.5                         | 29.5        | 28.7        | 26.6         | 26.5        | 27.2         |
| EvNet                             | <b>44.3</b>                  | <b>47.2</b> | 47.7        | 46.3        | 38.8        | 40.0        | 51.6                         | 69.3        | 50.4        | 48.5         | 65.4        | 72.3         |
| <b>Seg. – Seg. class sky</b>      |                              |             |             |             |             |             |                              |             |             |              |             |              |
| PostNet                           | 61.9                         | <b>54.3</b> | <b>57.4</b> | 34.0        | 37.5        | 43.3        | <b>92.9</b>                  | <b>92.2</b> | <b>91.1</b> | <b>99.9</b>  | <b>99.9</b> | <b>100.0</b> |
| PriorNet                          | 31.0                         | 30.8        | 30.8        | 30.8        | 30.8        | 36.9        | 31.2                         | 30.8        | 30.8        | 30.8         | 30.8        | 30.8         |
| DDNet                             | 30.8                         | 30.8        | 33.0        | 37.8        | 59.4        | <b>92.1</b> | 30.8                         | 30.8        | 30.8        | 30.8         | 30.8        | 30.8         |
| EvNet                             | <b>66.7</b>                  | 42.3        | 45.6        | <b>49.0</b> | <b>61.5</b> | 50.1        | 74.6                         | 57.3        | 51.2        | 45.8         | 60.0        | 63.2         |



Table 45: Adversarial training with CE: OOD detection based on differential entropy under Noise uncertainty attacks against differential entropy on ID data and OOD data (AUC-PR).

| Att. Rad.                         | ID-Attack (non-attacked OOD) |             |             |             |              |              | OOD-Attack (non-attacked ID) |             |              |              |              |              |
|-----------------------------------|------------------------------|-------------|-------------|-------------|--------------|--------------|------------------------------|-------------|--------------|--------------|--------------|--------------|
|                                   | 0.1                          | 0.2         | 0.5         | 1.0         | 2.0          | 4.0          | 0.1                          | 0.2         | 0.5          | 1.0          | 2.0          | 4.0          |
| <b>MNIST – KMNIST</b>             |                              |             |             |             |              |              |                              |             |              |              |              |              |
| PostNet                           | 91.7                         | 72.7        | 32.4        | <b>36.2</b> | 33.2         | 30.7         | 93.0                         | 85.5        | 89.9         | 90.5         | 73.1         | 99.1         |
| PriorNet                          | <b>99.7</b>                  | <b>98.4</b> | <b>71.5</b> | 34.3        | <b>37.3</b>  | <b>38.7</b>  | <b>99.2</b>                  | 96.8        | 96.8         | 99.3         | <b>100.0</b> | 77.4         |
| DDNet                             | 96.6                         | 79.5        | 31.9        | 31.2        | 30.9         | 35.0         | 98.6                         | <b>99.5</b> | <b>99.9</b>  | <b>100.0</b> | 99.8         | 98.5         |
| EvNet                             | 87.4                         | 49.9        | 32.8        | 32.0        | 33.2         | 36.3         | 87.4                         | 46.8        | 48.6         | 45.1         | 33.3         | <b>100.0</b> |
| <b>CIFAR10 – SVHN</b>             |                              |             |             |             |              |              |                              |             |              |              |              |              |
| PostNet                           | 43.9                         | 31.9        | 30.7        | 30.7        | <b>56.2</b>  | 31.5         | 85.1                         | <b>84.8</b> | 85.2         | 97.0         | 82.2         | 99.5         |
| PriorNet                          | 31.4                         | 32.8        | <b>85.8</b> | <b>37.1</b> | 30.7         | 30.8         | 35.2                         | 40.1        | 30.8         | 42.1         | <b>99.0</b>  | <b>100.0</b> |
| DDNet                             | 50.8                         | <b>42.8</b> | 30.7        | 32.8        | 30.7         | <b>94.9</b>  | <b>82.3</b>                  | 80.3        | <b>99.2</b>  | <b>97.8</b>  | 98.9         | 63.9         |
| EvNet                             | <b>56.2</b>                  | 34.4        | 32.1        | 32.4        | 37.9         | 46.7         | 59.8                         | 63.2        | 82.5         | 92.0         | 41.6         | 51.2         |
| <b>Sens. – Sens. class 10, 11</b> |                              |             |             |             |              |              |                              |             |              |              |              |              |
| PostNet                           | <b>30.8</b>                  | <b>47.8</b> | <b>50.0</b> | 50.0        | 50.0         | 50.0         | <b>98.7</b>                  | <b>99.8</b> | <b>100.0</b> | <b>100.0</b> | <b>99.8</b>  | <b>100.0</b> |
| PriorNet                          | 30.7                         | 30.7        | 30.9        | <b>87.7</b> | <b>100.0</b> | <b>100.0</b> | 31.0                         | 30.7        | 32.4         | 31.4         | 34.2         | 30.7         |
| DDNet                             | 30.7                         | 30.7        | 47.4        | 75.0        | 92.9         | 79.7         | 30.7                         | 30.7        | 30.7         | 41.3         | 34.3         | 39.6         |
| EvNet                             | <b>30.8</b>                  | 30.8        | 40.8        | 36.3        | 50.7         | 34.2         | 34.5                         | 31.0        | 34.4         | 38.8         | 47.4         | 51.1         |
| <b>Seg. – Seg. class sky</b>      |                              |             |             |             |              |              |                              |             |              |              |              |              |
| PostNet                           | 34.2                         | <b>31.0</b> | <b>42.6</b> | <b>49.9</b> | 50.0         | 50.0         | <b>97.7</b>                  | <b>93.7</b> | <b>99.8</b>  | <b>100.0</b> | <b>100.0</b> | <b>100.0</b> |
| PriorNet                          | 30.8                         | 30.8        | 30.8        | 30.8        | 30.9         | <b>100.0</b> | 30.9                         | 30.8        | 30.8         | 30.9         | 31.2         | 32.9         |
| DDNet                             | 30.8                         | 30.8        | 30.8        | 31.3        | <b>77.8</b>  | 93.3         | 30.8                         | 30.8        | 30.8         | 30.8         | 30.8         | 32.3         |
| EvNet                             | <b>63.3</b>                  | 30.8        | 30.8        | 30.8        | 32.7         | 36.0         | 98.8                         | 40.2        | 40.4         | 34.8         | 50.0         | 32.5         |

Table 46: Adversarial training with Diff. Ent.: Accuracy based on differential entropy under PGD label attacks (AUC-PR).

| Att. Rad.         | 0.1         | 0.2         | 0.5         | 1.0         | 2.0         | 4.0         | 0.1            | 0.2         | 0.5         | 1.0         | 2.0         | 4.0        |
|-------------------|-------------|-------------|-------------|-------------|-------------|-------------|----------------|-------------|-------------|-------------|-------------|------------|
|                   | MNIST       |             |             |             |             |             | CIFAR10        |             |             |             |             |            |
| PostNet           | <b>99.1</b> | 98.8        | 96.8        | 88.8        | 65.9        | 15.6        | 72.9           | 50.7        | 12.9        | 3.1         | 0.4         | 0.4        |
| PriorNet          | 99.1        | 98.8        | <b>97.7</b> | <b>94.7</b> | <b>88.8</b> | <b>73.4</b> | 66.5           | 62.8        | <b>52.9</b> | <b>35.8</b> | <b>23.0</b> | <b>9.6</b> |
| DDNet             | 99.1        | <b>98.9</b> | 97.4        | 91.9        | 48.7        | 0.3         | <b>78.9</b>    | <b>63.1</b> | 22.0        | 1.9         | 0.0         | 0.0        |
| EvNet             | 98.3        | 98.1        | 95.2        | 91.0        | 72.7        | 40.1        | 65.6           | 48.9        | 14.8        | 8.4         | 3.8         | 1.8        |
| <b>Sensorless</b> |             |             |             |             |             |             | <b>Segment</b> |             |             |             |             |            |
| PostNet           | 16.1        | 7.4         | 5.8         | <b>7.5</b>  | <b>9.4</b>  | <b>12.5</b> | 84.7           | 47.1        | <b>22.3</b> | <b>6.4</b>  | <b>10.8</b> | <b>3.8</b> |
| PriorNet          | 33.3        | 15.6        | 3.7         | 0.0         | 0.0         | 0.0         | <b>93.9</b>    | <b>65.9</b> | 18.1        | 2.9         | 0.0         | 0.0        |
| DDNet             | 12.9        | 3.0         | 0.5         | 0.3         | 0.2         | 0.2         | 90.6           | 47.5        | 8.4         | 0.1         | 0.0         | 0.0        |
| EvNet             | <b>36.1</b> | <b>22.1</b> | <b>10.8</b> | 3.8         | 1.7         | 3.1         | 92.0           | 56.2        | 11.9        | 2.1         | 0.4         | 2.8        |

Table 47: Adversarial training with Diff. Ent.: Accuracy based on differential entropy under FGSM label attacks (AUC-PR).

| Att. Rad.         | 0.1         | 0.2         | 0.5         | 1.0         | 2.0         | 4.0         | 0.1            | 0.2         | 0.5         | 1.0         | 2.0         | 4.0         |
|-------------------|-------------|-------------|-------------|-------------|-------------|-------------|----------------|-------------|-------------|-------------|-------------|-------------|
|                   | MNIST       |             |             |             |             |             | CIFAR10        |             |             |             |             |             |
| PostNet           | <b>99.1</b> | 98.9        | 97.6        | 95.0        | 91.2        | 80.9        | 23.5           | 11.2        | 0.2         | 0.1         | 9.0         | 1.6         |
| PriorNet          | <b>99.1</b> | 98.8        | <b>97.9</b> | <b>95.9</b> | <b>93.5</b> | <b>87.4</b> | 31.6           | <b>14.4</b> | 6.2         | 7.8         | 0.2         | 1.4         |
| DDNet             | <b>99.1</b> | <b>99.0</b> | <b>97.9</b> | 94.9        | 78.4        | 23.3        | <b>36.8</b>    | 13.9        | <b>9.2</b>  | <b>10.3</b> | <b>10.0</b> | <b>10.0</b> |
| EvNet             | 98.3        | 98.3        | 95.7        | 95.4        | 88.9        | 63.7        | 24.4           | 4.8         | 0.5         | 9.0         | 11.2        | 3.9         |
| <b>Sensorless</b> |             |             |             |             |             |             | <b>Segment</b> |             |             |             |             |             |
| PostNet           | 21.4        | 10.6        | 10.3        | 12.3        | 12.4        | 12.5        | 83.9           | 53.7        | <b>27.8</b> | <b>15.4</b> | <b>20.1</b> | <b>19.1</b> |
| PriorNet          | <b>40.2</b> | 21.7        | 8.1         | 0.0         | 0.0         | 2.3         | 91.3           | 57.2        | 18.1        | 3.2         | 0.0         | 0.0         |
| DDNet             | 17.6        | 5.0         | 4.9         | 8.0         | 7.0         | 5.7         | 86.1           | 39.2        | 12.1        | 0.4         | 0.0         | 2.9         |
| EvNet             | 43.1        | <b>29.3</b> | <b>21.3</b> | <b>14.4</b> | <b>13.4</b> | <b>13.5</b> | <b>91.9</b>    | <b>65.3</b> | 17.9        | 2.9         | 0.1         | 0.8         |

Table 48: Adversarial training with Diff. Ent.: Accuracy based on differential entropy under Noise label attacks (AUC-PR).

| Att. Rad.         | 0.1         | 0.2         | 0.5         | 1.0         | 2.0         | 4.0         | 0.1            | 0.2         | 0.5         | 1.0         | 2.0         | 4.0         |
|-------------------|-------------|-------------|-------------|-------------|-------------|-------------|----------------|-------------|-------------|-------------|-------------|-------------|
|                   | MNIST       |             |             |             |             |             | CIFAR10        |             |             |             |             |             |
| PostNet           | 97.0        | 88.5        | 10.0        | 2.2         | 0.0         | <b>0.4</b>  | 71.8           | 54.2        | 30.7        | 21.6        | 16.8        | 14.6        |
| PriorNet          | <b>98.1</b> | 88.5        | <b>24.5</b> | <b>4.1</b>  | 0.0         | 0.0         | 67.2           | <b>65.2</b> | <b>58.9</b> | <b>48.5</b> | <b>40.5</b> | <b>31.4</b> |
| DDNet             | 97.8        | <b>92.5</b> | 6.4         | 2.2         | <b>0.1</b>  | 0.1         | <b>78.1</b>    | 63.8        | 34.2        | 16.0        | 8.0         | 6.0         |
| EvNet             | 96.2        | 87.0        | 2.3         | 0.1         | 0.0         | 0.0         | 65.2           | 54.8        | 29.2        | 18.7        | 17.4        | 16.2        |
| <b>Sensorless</b> |             |             |             |             |             |             | <b>Segment</b> |             |             |             |             |             |
| PostNet           | 1.0         | <b>4.7</b>  | <b>11.4</b> | <b>11.7</b> | <b>11.7</b> | <b>11.7</b> | 27.6           | 1.5         | <b>3.6</b>  | <b>15.2</b> | <b>20.9</b> | <b>21.2</b> |
| PriorNet          | <b>4.7</b>  | 0.0         | 0.0         | 0.1         | 0.0         | 2.2         | <b>56.4</b>    | <b>16.1</b> | 2.1         | 0.9         | 0.0         | 0.0         |
| DDNet             | 0.3         | 0.0         | 0.0         | 0.0         | 0.0         | 0.1         | 49.4           | 6.1         | 0.0         | 0.0         | 0.0         | 0.0         |
| EvNet             | 0.9         | 0.0         | 0.9         | 0.2         | 3.5         | 3.1         | 51.2           | 10.6        | 0.3         | 0.0         | 0.0         | 0.6         |

Table 49: Adversarial training with Diff. Ent.: Certainty based on differential entropy under PGD label attacks (AUC-PR).

| Att. Rad.  | 0.1          | 0.2         | 0.5         | 1.0         | 2.0         | 4.0         |         | 0.1         | 0.2         | 0.5         | 1.0         | 2.0         | 4.0        |
|------------|--------------|-------------|-------------|-------------|-------------|-------------|---------|-------------|-------------|-------------|-------------|-------------|------------|
| MNIST      |              |             |             |             |             |             | CIFAR10 |             |             |             |             |             |            |
| PostNet    | 99.9         | 99.8        | 98.5        | 86.8        | 53.0        | 10.2        |         | 88.5        | 56.6        | 7.5         | 1.7         | 0.3         | 0.2        |
| PriorNet   | 99.7         | 99.6        | 98.0        | 91.4        | <b>76.2</b> | <b>54.8</b> |         | 51.0        | 44.7        | <b>36.3</b> | <b>23.7</b> | <b>13.8</b> | <b>5.5</b> |
| DDNet      | <b>100.0</b> | <b>99.9</b> | <b>99.7</b> | <b>97.6</b> | 47.9        | 0.1         |         | <b>94.7</b> | <b>82.4</b> | 21.2        | 1.1         | 0.0         | 0.0        |
| EvNet      | 99.2         | 98.9        | 96.8        | 86.5        | 60.8        | 33.73       |         | 80.6        | 50.4        | 14.1        | 9.1         | 9.7         | 2.2        |
| Sensorless |              |             |             |             |             |             | Segment |             |             |             |             |             |            |
| PostNet    | 10.6         | 5.3         | 5.8         | <b>7.5</b>  | <b>9.5</b>  | <b>12.5</b> |         | 76.1        | 30.1        | <b>13.4</b> | <b>4.9</b>  | <b>13.2</b> | <b>3.8</b> |
| PriorNet   | <b>22.6</b>  | 10.3        | 3.8         | 0.0         | 0.0         | 0.0         |         | <b>97.9</b> | <b>63.8</b> | 11.4        | 1.7         | 0.0         | 0.0        |
| DDNet      | 13.2         | 2.2         | 0.4         | 0.3         | 0.1         | 0.2         |         | 95.8        | 51.1        | 5.0         | 0.3         | 0.0         | 0.0        |
| EvNet      | <b>22.6</b>  | <b>12.8</b> | <b>5.9</b>  | 2.0         | 1.1         | 2.9         |         | 94.5        | 44.3        | 7.0         | 1.2         | 0.4         | 2.0        |

Table 50: Adversarial training with Diff. Ent.: Certainty based on differential entropy under FGSM label attacks (AUC-PR).

| Att. Rad.  | 0.1          | 0.2         | 0.5         | 1.0         | 2.0         | 4.0         |         | 0.1         | 0.2         | 0.5         | 1.0         | 2.0         | 4.0         |
|------------|--------------|-------------|-------------|-------------|-------------|-------------|---------|-------------|-------------|-------------|-------------|-------------|-------------|
| MNIST      |              |             |             |             |             |             | CIFAR10 |             |             |             |             |             |             |
| PostNet    | 99.9         | <b>99.9</b> | 99.4        | 97.1        | <b>92.3</b> | <b>82.2</b> |         | 88.3        | 67.8        | 30.9        | 19.2        | 15.9        | 16.7        |
| PriorNet   | 99.7         | 99.6        | 98.4        | 93.8        | 87.0        | 79.5        |         | 52.9        | 49.1        | <b>44.1</b> | <b>36.3</b> | <b>28.6</b> | <b>20.9</b> |
| DDNet      | <b>100.0</b> | <b>99.9</b> | <b>99.8</b> | <b>98.8</b> | 85.8        | 21.0        |         | <b>94.1</b> | <b>82.8</b> | 43.1        | 15.4        | 6.8         | 5.1         |
| EvNet      | 99.2         | 99.1        | 97.8        | 95.3        | 87.8        | 67.0        |         | 80.2        | 61.1        | 32.5        | 21.9        | 21.6        | 22.2        |
| Sensorless |              |             |             |             |             |             | Segment |             |             |             |             |             |             |
| PostNet    | 13.8         | 7.2         | 9.7         | 12.3        | 12.4        | 12.5        |         | 74.4        | 37.9        | 20.2        | <b>16.7</b> | <b>19.5</b> | <b>19.9</b> |
| PriorNet   | 32.3         | 19.1        | 9.1         | 0.0         | 0.0         | 5.2         |         | <b>96.2</b> | 56.6        | 11.4        | 10.7        | 0.0         | 0.0         |
| DDNet      | 19.7         | 7.0         | 3.7         | 7.6         | 7.6         | 7.1         |         | 92.2        | 40.5        | 7.0         | 0.4         | 0.0         | 4.9         |
| EvNet      | <b>37.8</b>  | <b>30.5</b> | <b>26.0</b> | <b>14.7</b> | <b>13.9</b> | <b>13.6</b> |         | 91.9        | <b>57.7</b> | <b>11.8</b> | 2.3         | 0.7         | 1.1         |

Table 51: Adversarial training with Diff. Ent.: Certainty based on differential entropy under Noise label attacks (AUC-PR).

| Att. Rad.  | 0.1         | 0.2         | 0.5         | 1.0         | 2.0         | 4.0         |         | 0.1         | 0.2         | 0.5         | 1.0         | 2.0         | 4.0         |
|------------|-------------|-------------|-------------|-------------|-------------|-------------|---------|-------------|-------------|-------------|-------------|-------------|-------------|
| MNIST      |             |             |             |             |             |             | CIFAR10 |             |             |             |             |             |             |
| PostNet    | 99.7        | 99.2        | 64.5        | 8.7         | 0.0         | <b>0.5</b>  |         | 77.4        | 14.6        | 0.3         | 0.1         | 9.1         | 3.7         |
| PriorNet   | <b>99.9</b> | 98.8        | <b>84.5</b> | <b>17.5</b> | 0.0         | 0.0         |         | 44.7        | 11.3        | 13.6        | 9.0         | 0.4         | 2.6         |
| DDNet      | 99.7        | <b>99.4</b> | 39.5        | 5.9         | <b>0.6</b>  | 0.3         |         | <b>86.1</b> | <b>46.5</b> | <b>15.5</b> | <b>17.4</b> | <b>10.2</b> | <b>10.1</b> |
| EvNet      | 99.2        | 97.0        | 19.4        | 0.1         | 0.0         | 0.0         |         | 67.1        | 12.7        | 4.5         | 12.8        | 13.2        | 3.3         |
| Sensorless |             |             |             |             |             |             | Segment |             |             |             |             |             |             |
| PostNet    | 0.6         | <b>5.1</b>  | <b>12.2</b> | <b>11.7</b> | <b>11.7</b> | <b>11.7</b> |         | 36.7        | 2.0         | 3.6         | <b>17.2</b> | <b>20.8</b> | <b>21.3</b> |
| PriorNet   | <b>8.5</b>  | 0.0         | 0.0         | 0.2         | 0.0         | 2.0         |         | <b>90.5</b> | <b>32.8</b> | <b>7.1</b>  | 1.2         | 0.0         | 0.0         |
| DDNet      | 1.5         | 0.0         | 0.0         | 0.0         | 0.0         | 0.0         |         | 79.6        | 21.8        | 0.0         | 0.0         | 0.0         | 0.0         |
| EvNet      | 1.5         | 0.0         | 1.0         | 0.2         | 4.9         | 4.8         |         | 75.7        | 22.0        | 3.2         | 0.0         | 0.0         | 0.7         |

Table 52: Adversarial training with Diff. Ent.: Attack-Detection based on differential entropy under PGD label attacks (AUC-PR).

| Att. Rad.  | 0.1         | 0.2         | 0.5         | 1.0         | 2.0         | 4.0         |         | 0.1         | 0.2         | 0.5         | 1.0         | 2.0         | 4.0         |
|------------|-------------|-------------|-------------|-------------|-------------|-------------|---------|-------------|-------------|-------------|-------------|-------------|-------------|
| MNIST      |             |             |             |             |             |             | CIFAR10 |             |             |             |             |             |             |
| PostNet    | 57.9        | 65.4        | 87.1        | 93.6        | 79.3        | 47.7        |         | <b>63.1</b> | <b>67.1</b> | 41.7        | 34.4        | 35.0        | 36.5        |
| PriorNet   | <b>66.9</b> | <b>76.0</b> | <b>95.1</b> | <b>96.4</b> | 88.7        | 74.8        |         | 55.7        | 55.8        | 53.1        | <b>48.9</b> | <b>43.3</b> | 37.8        |
| DDNet      | 53.7        | 58.5        | 69.3        | 85.5        | <b>96.1</b> | <b>87.7</b> |         | 56.7        | 62.5        | <b>60.4</b> | 41.2        | 32.6        | 31.8        |
| EvNet      | 54.3        | 58.9        | 63.2        | 72.3        | 69.4        | 59.1        |         | 55.9        | 60.2        | 49.7        | 44.6        | 41.4        | <b>39.4</b> |
| Sensorless |             |             |             |             |             |             | Segment |             |             |             |             |             |             |
| PostNet    | 49.8        | 41.5        | 36.3        | <b>51.0</b> | <b>85.9</b> | <b>99.0</b> |         | 95.0        | 77.6        | 48.9        | <b>42.9</b> | <b>45.2</b> | <b>68.5</b> |
| PriorNet   | 50.4        | 39.4        | 31.6        | 30.8        | 30.7        | 30.7        |         | 86.1        | <b>89.7</b> | <b>50.8</b> | 37.5        | 32.9        | 30.8        |
| DDNet      | <b>52.2</b> | 41.5        | 35.5        | 32.3        | 31.5        | 35.9        |         | 77.9        | 87.3        | 43.4        | 32.4        | 30.9        | 30.8        |
| EvNet      | 48.0        | <b>44.3</b> | <b>38.8</b> | 35.2        | 39.1        | 48.9        |         | <b>95.4</b> | 77.9        | 42.6        | 33.7        | 31.3        | 31.6        |

Table 53: Adversarial training with Diff. Ent.: Attack-Detection based on differential entropy under FGSM label attacks (AUC-PR).

| Att. Rad.  | 0.1         | 0.2         | 0.5         | 1.0         | 2.0         | 4.0          |         | 0.1         | 0.2         | 0.5         | 1.0         | 2.0         | 4.0         |
|------------|-------------|-------------|-------------|-------------|-------------|--------------|---------|-------------|-------------|-------------|-------------|-------------|-------------|
| MNIST      |             |             |             |             |             |              | CIFAR10 |             |             |             |             |             |             |
| PostNet    | 56.2        | 61.6        | 78.0        | 89.5        | 92.1        | 90.7         |         | <b>63.8</b> | <b>68.8</b> | 65.8        | 62.9        | 67.0        | 73.6        |
| PriorNet   | <b>67.3</b> | <b>76.9</b> | <b>95.3</b> | <b>98.0</b> | <b>98.0</b> | 98.0         |         | 58.0        | 62.5        | <b>67.3</b> | <b>67.3</b> | <b>65.9</b> | <b>62.2</b> |
| DDNet      | 53.8        | 58.6        | 68.7        | 83.9        | 95.8        | <b>98.9</b>  |         | 57.7        | 63.8        | 71.0        | 72.8        | 74.8        | 79.3        |
| EvNet      | 53.7        | 57.2        | 59.8        | 65.2        | 71.5        | 72.4         |         | 56.2        | 62.4        | 58.9        | 59.0        | 63.2        | 70.5        |
| Sensorless |             |             |             |             |             |              | Segment |             |             |             |             |             |             |
| PostNet    | <b>98.3</b> | <b>99.8</b> | <b>99.9</b> | <b>99.9</b> | <b>99.9</b> | <b>100.0</b> |         | <b>96.0</b> | <b>93.3</b> | <b>93.1</b> | <b>97.4</b> | <b>99.8</b> | <b>99.6</b> |
| PriorNet   | 67.0        | 56.0        | 35.8        | 30.8        | 30.7        | 30.7         |         | 88.6        | 89.3        | 55.1        | 45.2        | 37.6        | 30.8        |
| DDNet      | 60.1        | 50.0        | 40.3        | 32.5        | 31.5        | 33.8         |         | 81.6        | 89.2        | 56.9        | 49.1        | 35.8        | 31.8        |
| EvNet      | 68.7        | 69.8        | 69.9        | 68.6        | 68.8        | 73.2         |         | 95.9        | 86.6        | 66.2        | 63.2        | 74.2        | 77.2        |

Table 54: Adversarial training with Diff. Ent.: Attack-Detection based on differential entropy under Noise label attacks (AUC-PR).

| Att. Rad.  | 0.1         | 0.2          | 0.5          | 1.0          | 2.0          | 4.0          |  | 0.1         | 0.2         | 0.5         | 1.0          | 2.0          | 4.0          |
|------------|-------------|--------------|--------------|--------------|--------------|--------------|--|-------------|-------------|-------------|--------------|--------------|--------------|
| MNIST      |             |              |              |              |              |              |  | CIFAR10     |             |             |              |              |              |
| PostNet    | 53.7        | 67.7         | 94.5         | 94.1         | 98.1         | <b>100.0</b> |  | <b>85.8</b> | 79.1        | 93.0        | <b>98.5</b>  | <b>96.3</b>  | 96.6         |
| PriorNet   | 33.1        | 42.4         | 80.8         | 93.8         | 78.8         | 56.0         |  | 52.3        | 38.2        | 51.8        | 38.1         | 87.4         | <b>99.9</b>  |
| DDNet      | <b>56.0</b> | <b>86.7</b>  | <b>99.9</b>  | <b>100.0</b> | <b>100.0</b> | 99.4         |  | 79.5        | <b>90.9</b> | <b>99.6</b> | 98.2         | 96.2         | 85.0         |
| EvNet      | 50.8        | 71.7         | 83.1         | 88.2         | 68.4         | 88.0         |  | 67.9        | 87.0        | 93.3        | 89.6         | 93.7         | 97.3         |
| Sensorless |             |              |              |              |              |              |  | Segment     |             |             |              |              |              |
| PostNet    | <b>99.9</b> | <b>100.0</b> | <b>100.0</b> | <b>100.0</b> | <b>99.9</b>  | <b>100.0</b> |  | <b>93.2</b> | <b>99.3</b> | <b>99.9</b> | <b>100.0</b> | <b>100.0</b> | <b>100.0</b> |
| PriorNet   | 56.7        | 42.9         | 32.0         | 30.8         | 31.0         | 30.7         |  | 55.9        | 63.1        | 41.7        | 33.3         | 30.8         | 30.8         |
| DDNet      | 51.2        | 43.9         | 33.8         | 32.4         | 31.7         | 35.0         |  | 55.9        | 58.9        | 42.1        | 33.4         | 31.1         | 32.7         |
| EvNet      | 69.2        | 58.6         | 71.7         | 52.3         | 70.9         | 77.6         |  | 63.0        | 62.7        | 63.9        | 54.4         | 74.6         | 61.2         |

Table 55: Adversarial training with Diff. Ent.: OOD detection based on differential entropy under PGD uncertainty attacks against differential entropy on ID data and OOD data (AUC-PR).

| Att. Rad.                  | ID-Attack (non-attacked OOD) |             |             |             |             |             |  | OOD-Attack (non-attacked ID) |             |             |             |             |             |
|----------------------------|------------------------------|-------------|-------------|-------------|-------------|-------------|--|------------------------------|-------------|-------------|-------------|-------------|-------------|
|                            | 0.1                          | 0.2         | 0.5         | 1.0         | 2.0         | 4.0         |  | 0.1                          | 0.2         | 0.5         | 1.0         | 2.0         | 4.0         |
| MNIST – KMNIST             |                              |             |             |             |             |             |  |                              |             |             |             |             |             |
| PostNet                    | 92.6                         | 94.0        | 89.5        | 69.1        | 49.6        | 15.6        |  | 91.9                         | 91.4        | 79.8        | 54.2        | 42.4        | 46.0        |
| PriorNet                   | <b>99.6</b>                  | <b>99.3</b> | <b>97.6</b> | <b>93.7</b> | <b>81.4</b> | <b>50.8</b> |  | <b>99.6</b>                  | <b>99.2</b> | 97.4        | 92.1        | 66.3        | 37.6        |
| DDNet                      | 99.1                         | 98.9        | <b>97.6</b> | 93.6        | 60.7        | 30.7        |  | 99.1                         | 99.0        | <b>98.3</b> | <b>97.0</b> | <b>91.4</b> | <b>77.5</b> |
| EvNet                      | 73.4                         | 66.7        | 72.9        | 57.7        | 49.3        | 45.0        |  | 63.7                         | 51.3        | 58.8        | 35.1        | 33.4        | 36.4        |
| CIFAR10 – SVHN             |                              |             |             |             |             |             |  |                              |             |             |             |             |             |
| PostNet                    | 68.6                         | 46.1        | 21.7        | 17.5        | 16.2        | 15.6        |  | 63.3                         | 37.4        | 19.0        | 17.4        | 16.7        | 16.8        |
| PriorNet                   | 17.3                         | 15.9        | 17.4        | 15.5        | 15.4        | 15.4        |  | 17.1                         | 15.7        | 16.6        | 15.4        | 15.4        | 15.4        |
| DDNet                      | <b>77.5</b>                  | <b>66.0</b> | <b>34.5</b> | 16.4        | 15.4        | 15.4        |  | <b>79.6</b>                  | <b>67.4</b> | <b>33.2</b> | 16.9        | 15.4        | 15.4        |
| EvNet                      | 57.8                         | 35.2        | 22.0        | <b>21.5</b> | <b>17.5</b> | <b>16.0</b> |  | 52.7                         | 30.7        | 30.3        | <b>31.1</b> | <b>20.8</b> | <b>18.0</b> |
| Sens. – Sens. class 10, 11 |                              |             |             |             |             |             |  |                              |             |             |             |             |             |
| PostNet                    | <b>39.6</b>                  | <b>34.8</b> | <b>41.8</b> | <b>46.0</b> | <b>44.9</b> | <b>47.6</b> |  | <b>41.1</b>                  | <b>40.6</b> | <b>30.8</b> | <b>35.6</b> | <b>83.0</b> | <b>99.5</b> |
| PriorNet                   | 26.6                         | 26.5        | 26.5        | 26.5        | 26.5        | 26.6        |  | 28.8                         | 27.0        | 26.6        | 26.9        | 26.5        | 26.5        |
| DDNet                      | 26.8                         | 26.5        | 26.5        | 26.6        | 26.6        | 28.0        |  | 26.8                         | 26.6        | 26.7        | 26.7        | 26.6        | 26.6        |
| EvNet                      | 31.0                         | 29.4        | 27.2        | 29.1        | 32.4        | 36.5        |  | 39.1                         | 35.1        | 28.9        | 28.7        | 30.0        | 38.3        |
| Seg. – Seg. class sky      |                              |             |             |             |             |             |  |                              |             |             |             |             |             |
| PostNet                    | <b>91.7</b>                  | <b>45.3</b> | <b>44.6</b> | <b>38.8</b> | <b>46.0</b> | <b>49.4</b> |  | <b>98.7</b>                  | 67.3        | <b>44.1</b> | <b>47.7</b> | <b>37.5</b> | <b>59.4</b> |
| PriorNet                   | 31.2                         | 30.8        | 30.8        | 30.8        | 30.8        | 30.8        |  | 31.7                         | 30.8        | 30.8        | 30.8        | 30.8        | 30.8        |
| DDNet                      | 31.0                         | 30.8        | 30.8        | 30.8        | 30.8        | 30.8        |  | 31.2                         | 30.8        | 30.8        | 30.8        | 30.8        | 30.8        |
| EvNet                      | 58.0                         | 39.4        | 31.0        | 30.8        | 30.8        | 31.5        |  | 84.1                         | <b>71.7</b> | 36.1        | 31.1        | 30.8        | 30.8        |

Table 56: Adversarial training with Diff. Ent.: OOD detection based on differential entropy under FGSM uncertainty attacks against differential entropy on ID data and OOD data (AUC-PR).

| Att. Rad.                  | ID-Attack (non-attacked OOD) |             |             |             |             |             |  | OOD-Attack (non-attacked ID) |             |             |             |             |              |
|----------------------------|------------------------------|-------------|-------------|-------------|-------------|-------------|--|------------------------------|-------------|-------------|-------------|-------------|--------------|
|                            | 0.1                          | 0.2         | 0.5         | 1.0         | 2.0         | 4.0         |  | 0.1                          | 0.2         | 0.5         | 1.0         | 2.0         | 4.0          |
| MNIST – KMNIST             |                              |             |             |             |             |             |  |                              |             |             |             |             |              |
| PostNet                    | 92.8                         | 94.2        | 93.1        | 84.7        | 81.2        | <b>72.9</b> |  | 92.1                         | 92.2        | 88.7        | 79.0        | 78.2        | 75.9         |
| PriorNet                   | <b>99.6</b>                  | <b>99.3</b> | 97.7        | 94.5        | <b>86.6</b> | 71.0        |  | <b>99.6</b>                  | <b>99.3</b> | 98.1        | 96.5        | 90.2        | 71.5         |
| DDNet                      | 99.1                         | 98.9        | <b>97.9</b> | <b>95.5</b> | 79.2        | 46.3        |  | 99.1                         | 99.0        | <b>98.5</b> | <b>97.8</b> | <b>95.4</b> | <b>92.1</b>  |
| EvNet                      | 73.7                         | 67.6        | 74.4        | 62.2        | 56.5        | 59.5        |  | 67.7                         | 57.6        | 67.5        | 49.8        | 49.0        | 55.0         |
| CIFAR10 – SVHN             |                              |             |             |             |             |             |  |                              |             |             |             |             |              |
| PostNet                    | 71.3                         | 60.8        | <b>67.1</b> | <b>68.7</b> | <b>61.8</b> | <b>54.4</b> |  | 65.7                         | 49.9        | 41.7        | 37.8        | <b>61.0</b> | <b>78.4</b>  |
| PriorNet                   | 17.5                         | 16.3        | 20.8        | 17.4        | 19.8        | 19.6        |  | 17.5                         | 16.4        | 21.7        | 17.2        | 21.0        | 20.1         |
| DDNet                      | <b>77.7</b>                  | <b>69.9</b> | 61.4        | 53.8        | 45.7        | 37.2        |  | <b>79.3</b>                  | <b>69.3</b> | <b>54.2</b> | 47.5        | 52.4        | 73.9         |
| EvNet                      | 62.9                         | 51.2        | 48.9        | 58.7        | 58.1        | 46.3        |  | 53.9                         | 35.0        | 37.9        | <b>51.4</b> | 56.4        | 59.6         |
| Sens. – Sens. class 10, 11 |                              |             |             |             |             |             |  |                              |             |             |             |             |              |
| PostNet                    | 40.1                         | 35.5        | 33.8        | 43.0        | 43.6        | 47.5        |  | <b>99.7</b>                  | <b>99.9</b> | <b>99.9</b> | <b>99.9</b> | <b>99.9</b> | <b>100.0</b> |
| PriorNet                   | 28.4                         | 29.5        | 39.4        | 53.3        | 93.0        | <b>98.3</b> |  | 30.2                         | 28.3        | 27.2        | 27.8        | 26.9        | 26.5         |
| DDNet                      | 32.2                         | 34.4        | <b>53.5</b> | <b>84.2</b> | <b>93.8</b> | 92.2        |  | 26.8                         | 26.6        | 26.7        | 26.7        | 26.6        | 26.6         |
| EvNet                      | <b>43.1</b>                  | <b>41.0</b> | 37.0        | 43.5        | 42.9        | 41.9        |  | 56.8                         | 56.4        | 57.8        | 60.0        | 66.0        | 67.8         |
| Seg. – Seg. class sky      |                              |             |             |             |             |             |  |                              |             |             |             |             |              |
| PostNet                    | <b>91.4</b>                  | <b>54.2</b> | <b>53.1</b> | 45.4        | 38.1        | 40.6        |  | <b>98.8</b>                  | <b>75.9</b> | <b>87.7</b> | <b>99.1</b> | <b>99.9</b> | <b>100.0</b> |
| PriorNet                   | 31.1                         | 30.8        | 30.8        | 30.8        | 30.8        | 39.2        |  | 31.5                         | 30.8        | 30.8        | 30.8        | 30.8        | 30.8         |
| DDNet                      | 30.9                         | 30.8        | 30.8        | 34.9        | <b>58.2</b> | <b>85.4</b> |  | 31.1                         | 30.8        | 30.8        | 30.8        | 30.8        | 30.8         |
| EvNet                      | 55.3                         | 46.6        | 51.8        | <b>51.0</b> | 48.9        | 41.4        |  | 86.6                         | 71.6        | 49.5        | 57.4        | 76.6        | 58.6         |

Table 57: Adversarial training with Diff. Ent.: OOD detection based on differential entropy under Noise uncertainty attacks against differential entropy on ID data and OOD data (AUC-PR).

| Att. Rad.                         | ID-Attack (non-attacked OOD) |             |             |             |              |              | OOD-Attack (non-attacked ID) |             |              |              |              |              |
|-----------------------------------|------------------------------|-------------|-------------|-------------|--------------|--------------|------------------------------|-------------|--------------|--------------|--------------|--------------|
|                                   | 0.1                          | 0.2         | 0.5         | 1.0         | 2.0          | 4.0          | 0.1                          | 0.2         | 0.5          | 1.0          | 2.0          | 4.0          |
| <b>MNIST – KMNIST</b>             |                              |             |             |             |              |              |                              |             |              |              |              |              |
| PostNet                           | 90.8                         | 81.0        | 39.1        | 38.3        | 30.8         | 30.7         | 88.1                         | 88.9        | 81.0         | 70.8         | 95.4         | <b>100.0</b> |
| PriorNet                          | 99.8                         | <b>93.6</b> | <b>41.0</b> | <b>42.1</b> | <b>40.0</b>  | <b>51.7</b>  | <b>100.0</b>                 | 99.3        | 98.1         | 94.0         | 44.8         | 32.1         |
| DDNet                             | <b>97.2</b>                  | 87.1        | 31.0        | 31.1        | 31.6         | 40.6         | 98.8                         | <b>99.5</b> | <b>99.9</b>  | <b>99.9</b>  | <b>100.0</b> | 98.1         |
| EvNet                             | 68.6                         | 52.2        | 31.9        | 33.1        | 32.9         | 31.3         | 53.2                         | 62.2        | 39.7         | 45.9         | 33.7         | 50.3         |
| <b>CIFAR10 – SVHN</b>             |                              |             |             |             |              |              |                              |             |              |              |              |              |
| PostNet                           | 46.7                         | <b>67.3</b> | <b>33.9</b> | 30.7        | <b>39.4</b>  | 44.0         | 88.0                         | 78.2        | 84.8         | 92.1         | 93.6         | 95.9         |
| PriorNet                          | 41.9                         | 37.0        | <b>33.9</b> | <b>42.5</b> | 32.6         | 30.7         | 35.4                         | 32.4        | 38.2         | 33.3         | 76.1         | <b>99.5</b>  |
| DDNet                             | <b>58.7</b>                  | 37.3        | 30.7        | 33.5        | 33.6         | <b>61.0</b>  | <b>90.6</b>                  | <b>88.3</b> | <b>99.0</b>  | <b>97.5</b>  | <b>93.9</b>  | 80.9         |
| EvNet                             | 48.9                         | 34.8        | 30.9        | 31.8        | 37.7         | 34.4         | 69.6                         | 77.7        | 85.3         | 87.4         | 93.1         | 95.7         |
| <b>Sens. – Sens. class 10, 11</b> |                              |             |             |             |              |              |                              |             |              |              |              |              |
| PostNet                           | <b>30.8</b>                  | <b>47.8</b> | <b>50.0</b> | 50.0        | 50.0         | 50.0         | <b>98.7</b>                  | <b>99.8</b> | <b>100.0</b> | <b>100.0</b> | <b>99.8</b>  | <b>100.0</b> |
| PriorNet                          | 30.7                         | 30.7        | 30.9        | <b>87.7</b> | <b>100.0</b> | <b>100.0</b> | 31.0                         | 30.7        | 32.4         | 31.4         | 34.2         | 30.7         |
| DDNet                             | 30.7                         | 30.7        | 47.4        | 75.0        | 92.9         | 79.7         | 30.7                         | 30.7        | 30.7         | 41.3         | 34.3         | 39.6         |
| EvNet                             | <b>30.8</b>                  | 30.8        | 40.8        | 36.3        | 50.7         | 34.2         | 34.5                         | 31.0        | 34.4         | 38.8         | 47.4         | 51.1         |
| <b>Seg. – Seg. class sky</b>      |                              |             |             |             |              |              |                              |             |              |              |              |              |
| PostNet                           | 34.2                         | <b>31.0</b> | <b>42.6</b> | <b>49.9</b> | 50.0         | 50.0         | 97.7                         | <b>93.7</b> | <b>99.8</b>  | <b>100.0</b> | <b>100.0</b> | <b>100.0</b> |
| PriorNet                          | 30.8                         | 30.8        | 30.8        | 30.8        | 30.9         | <b>100.0</b> | 30.9                         | 30.8        | 30.8         | 30.9         | 31.2         | 32.9         |
| DDNet                             | 30.8                         | 30.8        | 30.8        | 31.3        | <b>77.8</b>  | 93.3         | 30.8                         | 30.8        | 30.8         | 30.8         | 30.8         | 32.3         |
| EvNet                             | <b>63.3</b>                  | 30.8        | 30.8        | 30.8        | 32.7         | 36.0         | <b>98.8</b>                  | 40.2        | 40.4         | 34.8         | 50.0         | 32.5         |

#### A.6 VISUALIZATION OF DIFFERENTIAL ENTROPY DISTRIBUTIONS ON ID DATA AND OOD DATA

The following Figures visualize the differential entropy distribution for ID data and OOD data for all models with standard training. We used label attacks and uncertainty attacks for CIFAR10 and MNIST. Thus, they show how well the DBU models separate on clean and perturbed ID data and OOD data.

Figures 4 and 5 visualizes the differential entropy distribution of ID data and OOD data under label attacks. On CIFAR10, PriorNet and DDNet can barely distinguish between clean ID and OOD data. We observe a better ID/OOD distinction for PostNet and EvNet for clean data. However, we do not observe for any model an increase of the uncertainty estimates on label attacked data. Even worse, PostNet, PriorNet and DDNet seem to assign higher confidence on class label attacks. On MNIST, models show a slightly better behavior. They are capable to assign a higher uncertainty to label attacks up to some attack radius.

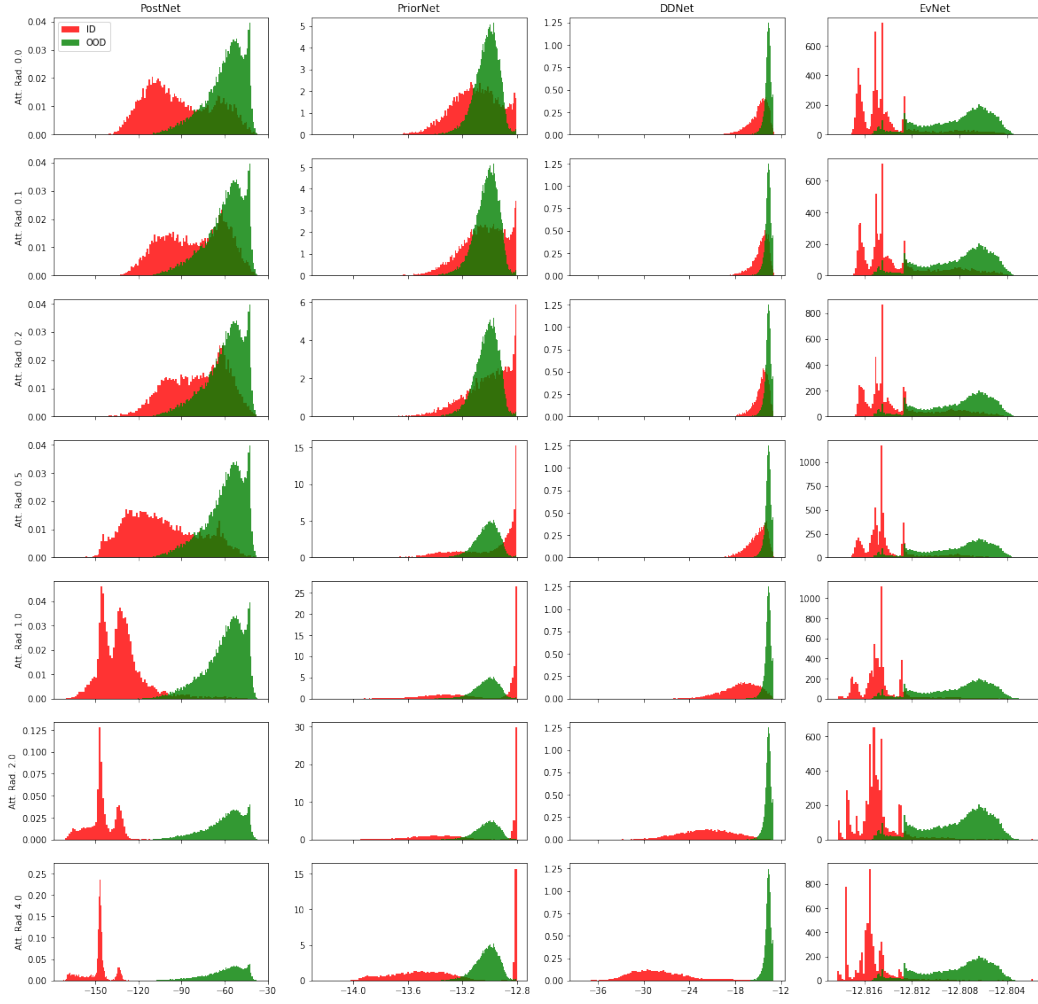

Figure 4: Visualization of the differential entropy distribution of ID data (CIFAR10) and OOD data (SVHN) under label attack. The first row corresponds to no attack. The other rows correspond to increasingly stronger attack strength.

Figures 6, 7, 8 and 9 visualize the differential entropy distribution of ID data and OOD data under uncertainty attacks. For both CIFAR10 and MNIST data sets, we observed that uncertainty estimations of all models can be manipulated. That is, OOD uncertainty attacks can shift the OOD uncertainty distribution to more certain predictions, and ID uncertainty attacks can shift the ID uncertainty distribution to less certain predictions.

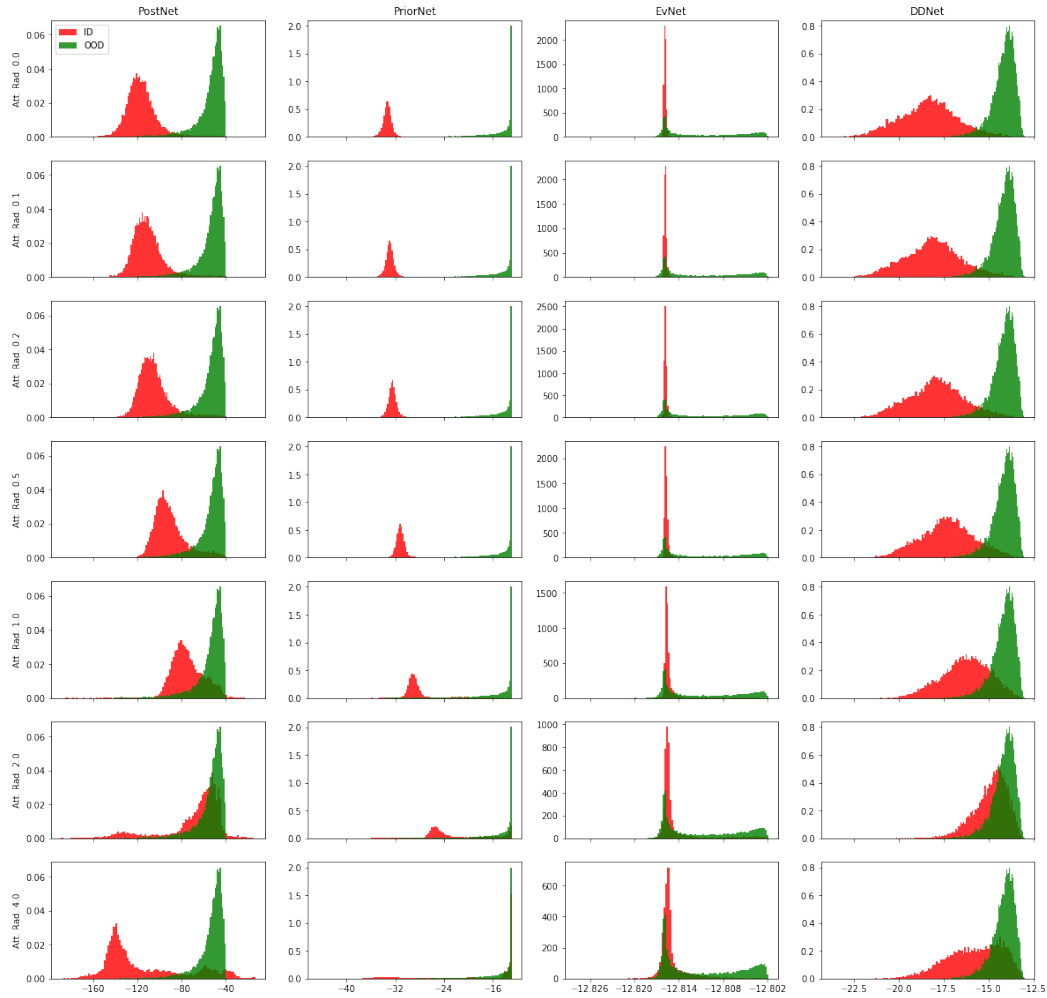

Figure 5: Visualization of the differential entropy distribution of ID data (MNIST) and OOD data (KMNIST) under label attack. The first row corresponds to no attack. The other rows correspond to increasingly stronger attack strength.

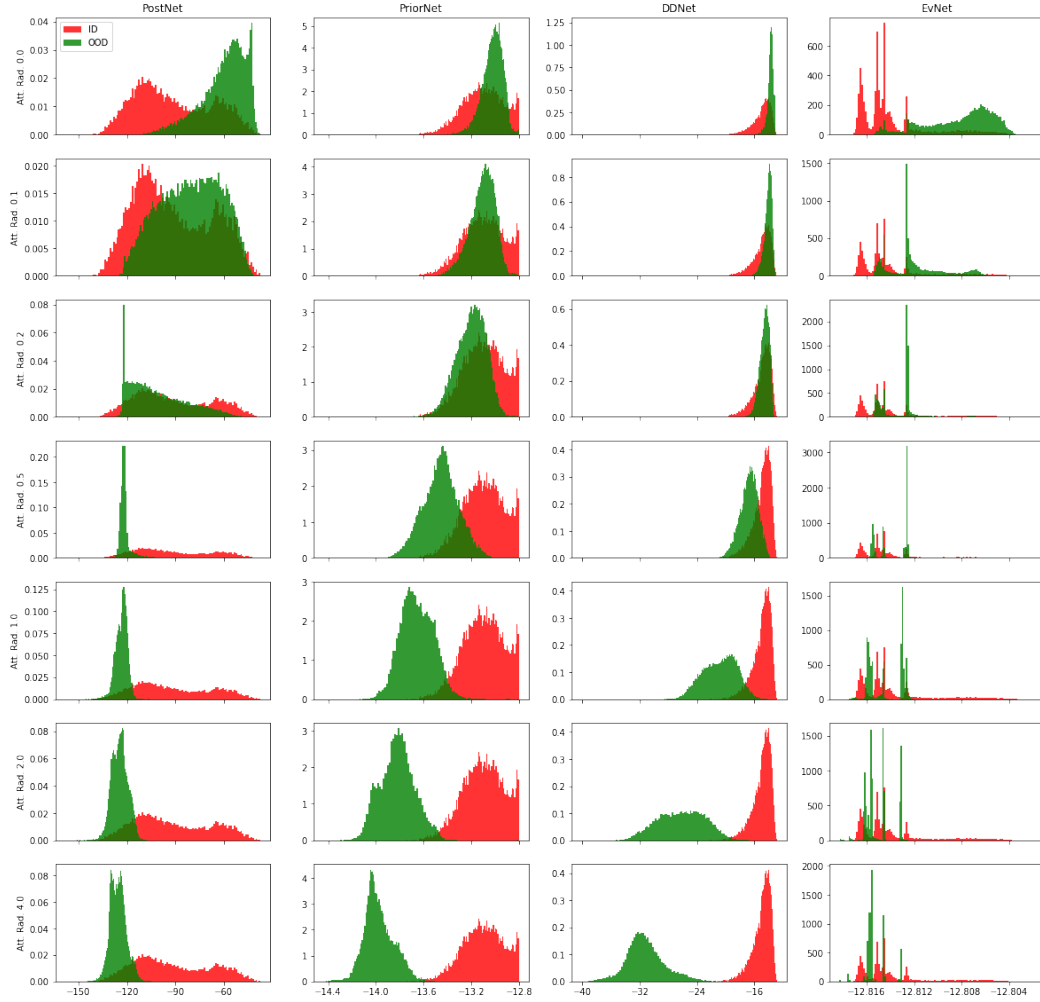

Figure 6: Visualization of the differential entropy distribution of ID data (CIFAR10) and OOD data (SVHN) under OOD uncertainty attack. The first row corresponds to no attack. The other rows correspond to increasingly stronger attack strength.

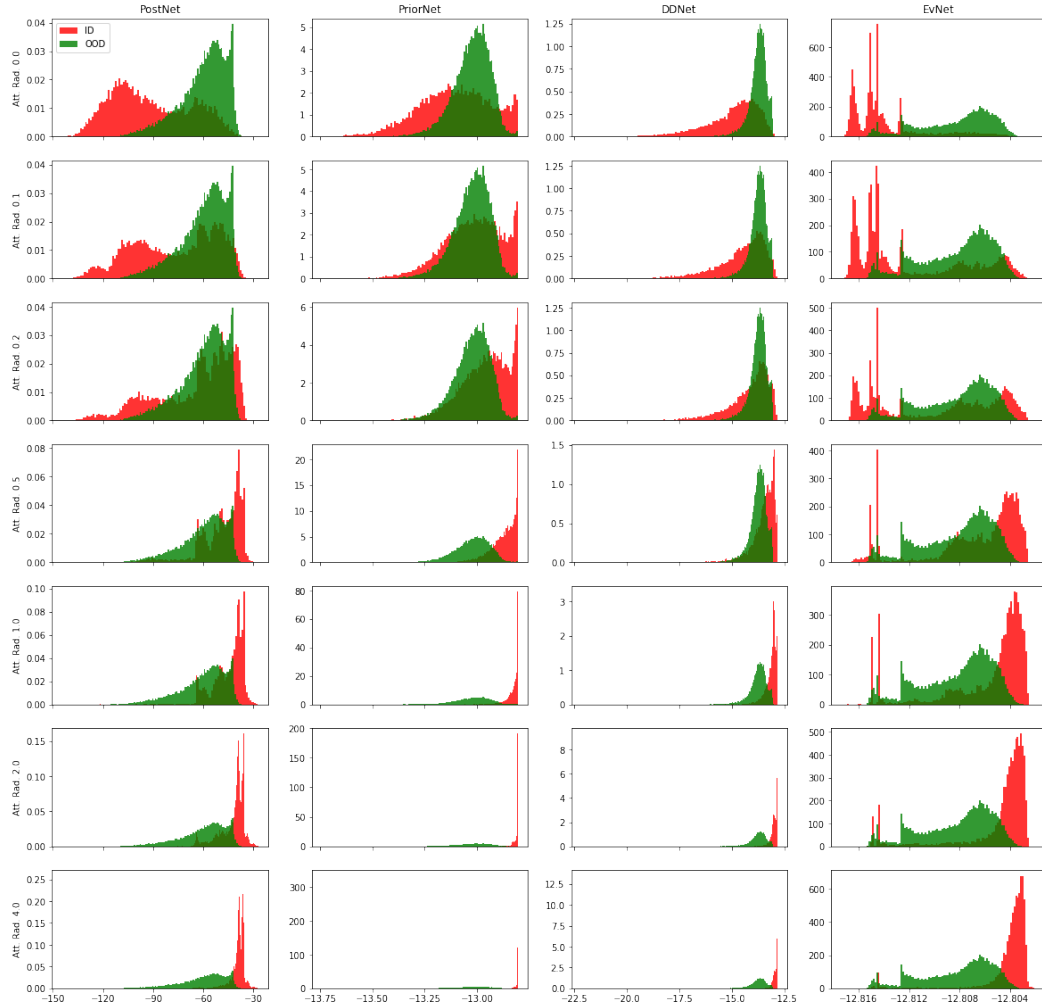

Figure 7: Visualization of the differential entropy distribution of ID data (CIFAR10) and OOD data (SVHN) under ID uncertainty attack. The first row corresponds to no attack. The other rows correspond to increasingly stronger attack strength.



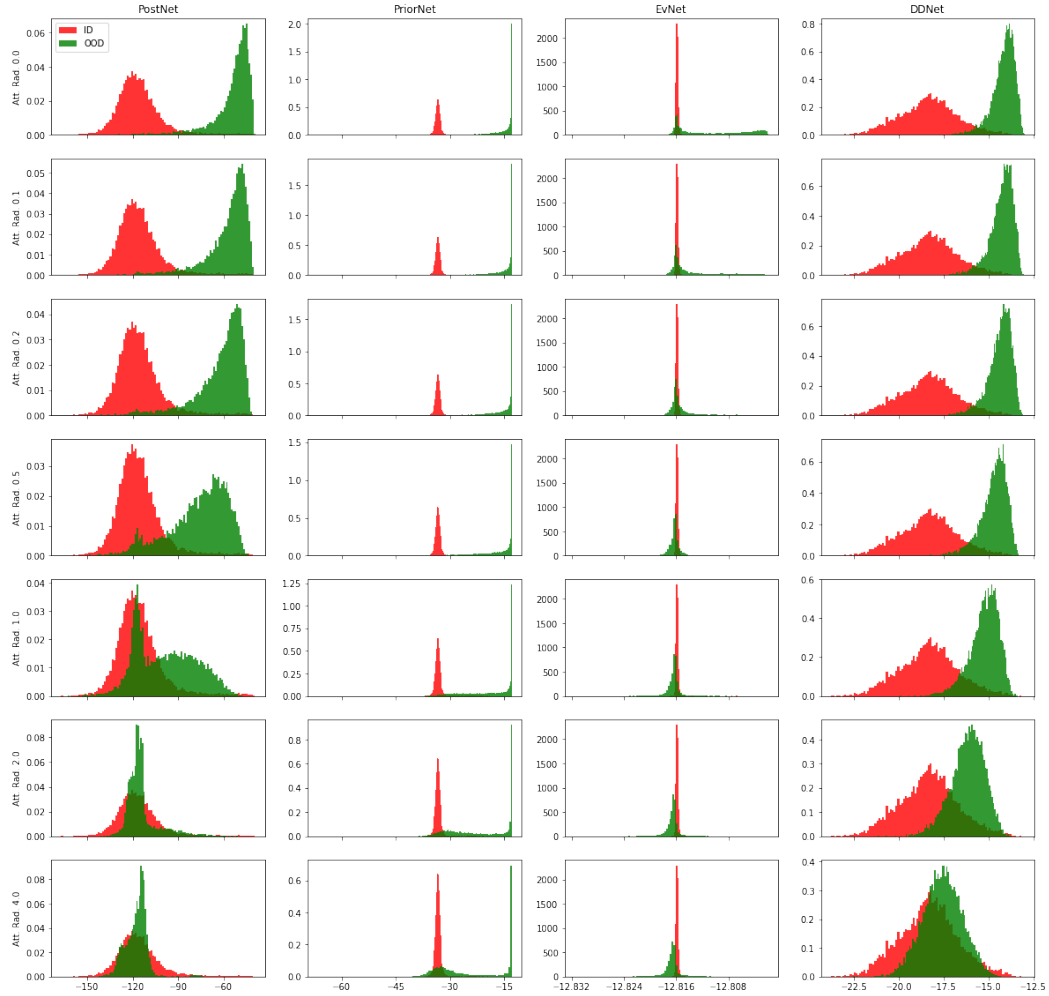

Figure 8: Visualization of the differential entropy distribution of ID data (MNIST) and OOD data (KMNIST) under OOD uncertainty attack. The first row corresponds to no attack. The other rows correspond to increasingly stronger attack strength.

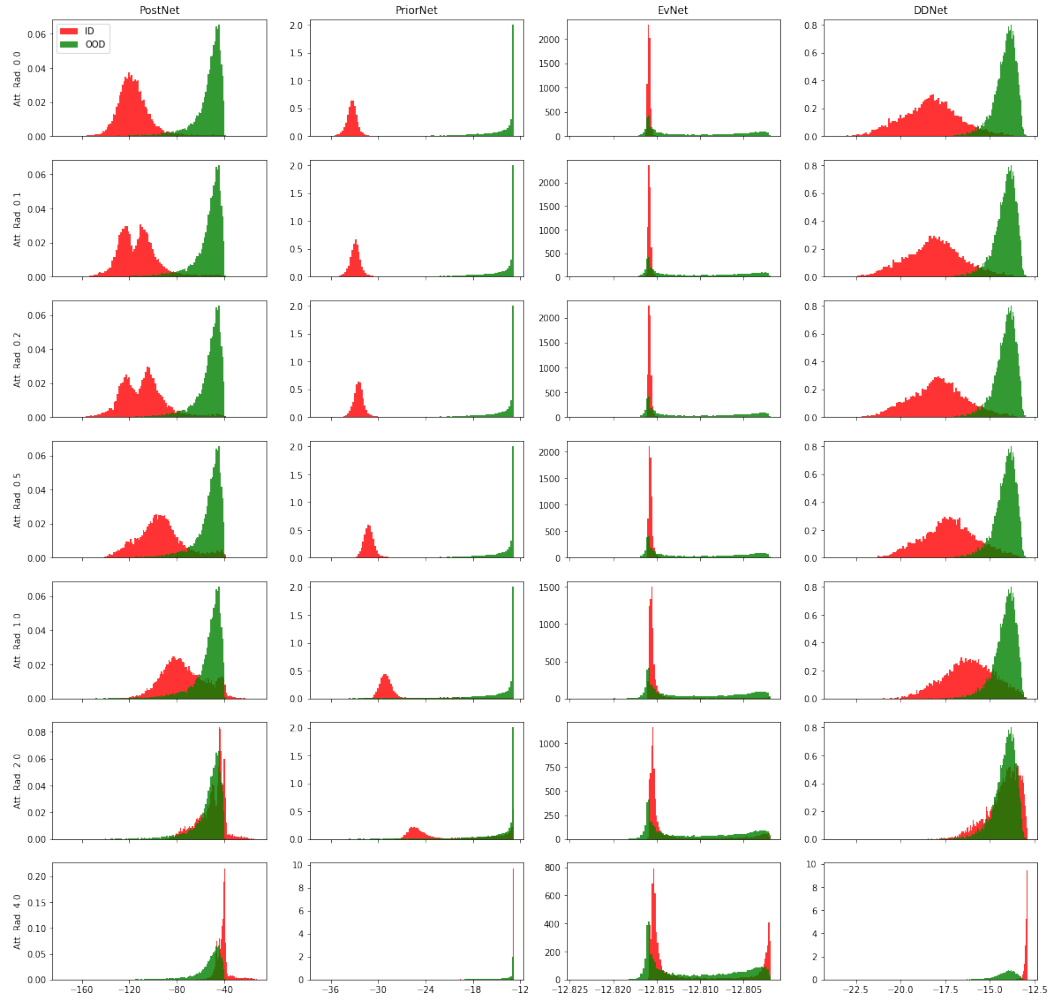

Figure 9: Visualization of the differential entropy distribution of ID data (MNIST) and OOD data (KMNIST) under ID uncertainty attack. The first row corresponds to no attack. The other rows correspond to increasingly stronger attack strength.
